# Supplementary material for: Analysis of age as a factor in NASA astronaut selection and career landmarks
Source: PLoS One. 2017 Jul 27;12(7):e0181381. doi: 10.1371/journal.pone.0181381 (PMC5531584; doi:10.1371/journal.pone.0181381)
Supplement: S3 File — (XLSX) [file pone.0181381.s003.xlsx]

## Sheet: Sheet1
Order	Name	Announcement Date	DOB	Retirement Date	DOD	First Flight Launch Date	Last Flight Launch Date	Selection Announcement Year	Age at Selection Announcement	Age at Retirement	Age at Last Flight Launch Date	Last Flight Launch Date to Retirement	Selection Announcement Date to Last Flight Launch Date	Selection Announcement Date to Retirement Date	First Flight Launch Date to Retirement Date	First Flight Launch Date to Last Flight Launch Date	Selection Announcement Date to First Flight Launch Date	Age at First Flight Launch Date	Active Astronaut	Gender	PhD	MS	MD	Military Experience	Previous NASA Experience Before Selection	NASA Pilot (From Bio)	NASA Management (From Bio)	NASA Pilot (From Crew Log)	Payload Specialist (From Crew Log)	Mission Specialist (From Crew Log)	Primary Data Source	Source 2	Source 3
1	Carpenter, M. Scott	1959-04-09	1925-05-01	1967-08-10	2013-10-10	1962-05-24	1962-05-24	1959	33.9384	42.2752	37.0623	5.21287	3.12389	8.33676	5.21287	0	3.12389	37.0623	0	M	0	0	0	1	0	1	0	1	0	0	www.jsc.nasa.gov/Bios/htmlbios/carpenter-ms.html	https://en.wikipedia.org/wiki/Scott_Carpenter	http://history.nasa.gov/40thmerc7/carpenter.htm
2	Cooper, L. Gordon, Jr.	1959-04-09	1927-03-06	1970-07-31	2004-10-04	1963-05-15	1965-08-21	1959	32.0931	43.4031	38.4613	4.94182	6.36824	11.3101	7.2115	2.26968	4.09856	36.1916	0	M	0	0	0	1	0	1	0	1	0	0	www.jsc.nasa.gov/Bios/htmlbios/cooper-lg.html	https://en.wikipedia.org/wiki/Gordon_Cooper
3	Glenn, John H., Jr.	1959-04-09	1921-07-18	1964-01-16	2016-12-08	1962-02-20	1962-02-20	1959	37.7248	42.4969	40.5941	1.90281	2.86927	4.77207	1.90281	0	2.86927	40.5941	0	M	0	0	0	1	0	1	0	0	1	0	www.jsc.nasa.gov/Bios/htmlbios/glenn-j.html	https://en.wikipedia.org/wiki/John_Glenn
4	Grissom, Virgil I.	1959-04-09	1926-04-03	Died Before Retirement	1967-01-27	1961-07-21	1965-03-23	1959	33.0157		38.9706		5.95483			3.67146	2.28337	35.2991	0	M	0	0	0	1	0	1	0	1	0	0	www.jsc.nasa.gov/Bios/htmlbios/grissom-vi.html
5	Schirra, Walter M., Jr.	1959-04-09	1923-03-12	1969-07-01	2007-05-02	1962-10-03	1968-10-11	1959	36.0767	46.3053	45.5852	0.720055	9.50856	10.2286	6.74333	6.02327	3.48528	39.5619	0	M	0	0	0	1	0	1	0	1	0	0	www.jsc.nasa.gov/Bios/htmlbios/schirra-wm.html	https://en.wikipedia.org/wiki/Wally_Schirra
6	Shepard, Alan B., Jr.	1959-04-09	1923-11-18	1974-08-01	1998-07-21	1961-05-05	1971-01-31	1959	35.3895	50.7023	47.2033	3.49897	11.8138	15.3128	13.2402	9.74127	2.07255	37.462	0	M	0	0	0	1	0	1	0	1	0	0	www.jsc.nasa.gov/Bios/htmlbios/shepard-alan.html
7	Slayton, Donald K.	1959-04-09	1924-03-01	1982-02-27	1993-06-13	1975-07-15	1975-07-15	1959	35.1047	57.9932	51.3703	6.62286	16.2656	22.8884	6.62286	0	16.2656	51.3703	0	M	0	0	0	1	0	1	0	1	0	0	www.jsc.nasa.gov/Bios/htmlbios/slayton.html	https://en.wikipedia.org/wiki/Deke_Slayton
8	Crews, Albert H.	1962-04-20	1929-03-23	1969-10-06	Alive (1/31/17)	Never Flew	Never Flew	1962	33.076	40.5394				7.46338					0	M	0	1	0	1	0	1	0	0	0	0	https://en.wikipedia.org/wiki/Albert_H._Crews	http://www.spacefacts.de/bios/astronauts/english/crews_albert.htm	http://www.pbs.org/wgbh/nova/astrospies/prof-01.html
9	Armstrong, Neil A.	1962-09-17	1930-08-05	1971-08-25	2012-08-25	1966-03-16	1969-07-16	1962	32.1177	41.0541	38.9459	2.10815	6.8282	8.93634	5.44285	3.3347	3.4935	35.6112	0	M	0	1	0	1	1	1	0	1	0	0	www.jsc.nasa.gov/Bios/htmlbios/armstrong-na.html	https://www.hq.nasa.gov/alsj/a11/a11.crew.html	https://www.wired.com/2012/08/neil-armstrong-dies/
10	Borman, Frank	1962-09-17	1928-03-14	1970-07-01	Alive (1/31/17)	1965-12-04	1968-12-21	1962	34.5106	42.2971	40.7721	1.52498	6.26146	7.78645	4.57221	3.04723	3.21424	37.7248	0	M	0	1	0	1	0	0	0	1	0	0	www.jsc.nasa.gov/Bios/htmlbios/borman-f.html	https://en.wikipedia.org/wiki/Frank_Borman
11	Conrad, Charles, Jr.	1962-09-17	1930-06-02	1973-12-15	1999-07-08	1965-08-21	1973-05-25	1962	32.293	43.5373	42.9788	0.558522	10.6858	11.2444	8.31759	7.75907	2.92676	35.2197	0	M	0	0	0	1	0	1	0	1	0	0	www.jsc.nasa.gov/Bios/htmlbios/conrad-c.html	http://www.space.com/20519-pete-conrad-astronaut-biography.html	https://en.wikipedia.org/wiki/Pete_Conrad
12	Lovell, James A., Jr.	1962-09-17	1928-03-25	1973-03-01	Alive (1/31/17)	1965-12-04	1970-04-11	1962	34.4805	44.9336	42.0452	2.88843	7.56468	10.4531	7.23888	4.35044	3.21424	37.6947	0	M	0	0	0	1	0	1	0	1	0	0	www.jsc.nasa.gov/Bios/htmlbios/lovell-ja.html
13	McDivitt, James A.	1962-09-17	1929-06-10	1972-06-15	Alive (1/31/17)	1965-06-03	1969-03-03	1962	33.2704	43.0144	39.729	3.28542	6.45859	9.74401	7.03354	3.74812	2.71047	35.9808	0	M	0	0	0	1	0	1	0	1	0	0	www.jsc.nasa.gov/Bios/htmlbios/mcdivitt-ja.html
14	See, Elliot M., Jr.	1962-09-17	1927-07-23	Died Before Retirement	1966-02-28	Never Flew	Never Flew	1962	35.154										0	M	0	1	0	1	0	1	0	0	0	0	www.jsc.nasa.gov/Bios/htmlbios/see-em.html
15	Stafford, Thomas P.	1962-09-17	1930-09-17	1975-11-01	Alive (1/31/17)	1965-12-04	1975-07-15	1962	32	45.1225	44.8241	0.298426	12.8241	13.1225	9.90828	9.60986	3.21424	35.2142	0	M	0	0	0	1	0	1	0	1	0	0	www.jsc.nasa.gov/Bios/htmlbios/stafford-tp.html	https://en.wikipedia.org/wiki/Thomas_P._Stafford	http://www.thespacerace.com/people/stafford
16	White, Edward H., II	1962-09-17	1930-11-14	Died Before Retirement	1967-01-27	1965-06-03	1965-06-03	1962	31.8412		34.5517		2.71047			0	2.71047	34.5517	0	M	0	1	0	1	0	1	0	1	0	0	www.jsc.nasa.gov/Bios/htmlbios/white-eh.html
17	Young, John W.	1962-09-17	1930-09-24	2004-12-31	Alive (1/31/17)	1965-03-23	1983-11-28	1962	31.9808	74.2697	53.1773	21.0924	21.1964	42.2888	39.7755	18.6831	2.51335	34.4942	0	M	0	0	0	1	0	1	0	1	0	0	www.jsc.nasa.gov/Bios/htmlbios/young.html
18	Aldrin, Buzz	1963-10-17	1930-01-20	1971-07-01	Alive (1/31/17)	1966-11-11	1969-07-16	1963	33.7385	41.4428	39.4853	1.95756	5.74675	7.70431	4.63518	2.67762	3.06913	36.8077	0	M	1	0	0	1	0	0	0	1	0	0	http://www.jsc.nasa.gov/Bios/htmlbios/aldrin-b.html	http://en.wikipedia.org/wiki/Buzz_Aldrin
19	Anders, William A.	1963-10-17	1933-10-17	1969-09-01	Alive (1/31/17)	1968-12-21	1968-12-21	1963	29.9986	35.8741	35.1786	0.695414	5.18001	5.87543	0.695414	0	5.18001	35.1786	0	M	0	1	0	1	0	1	0	1	0	0	www.jsc.nasa.gov/Bios/htmlbios/anders-wa.html	https://en.wikipedia.org/wiki/William_Anders	http://www.spacefacts.de/bios/astronauts/english/anders_william.htm
20	Bassett, Charles A., II	1963-10-17	1931-12-30	Died Before Retirement	1966-02-28	Never Flew	Never Flew	1963	31.7974										0	M	0	0	0	1	0	1	0	0	0	0	www.jsc.nasa.gov/Bios/htmlbios/bassett-ca.html
21	Bean, Alan L.	1963-10-17	1932-03-15	1981-06-15	Alive (1/31/17)	1969-11-14	1969-11-14	1963	31.5893	49.2512	37.6674	11.5838	6.07803	17.6619	11.5838	0	6.07803	37.6674	0	M	0	0	0	1	0	1	0	1	0	0	www.jsc.nasa.gov/Bios/htmlbios/bean-al.html	https://en.wikipedia.org/wiki/Alan_Bean
22	Cernan, Eugene A.	1963-10-17	1934-03-14	1976-07-01	Alive (1/31/17)	1966-06-03	1972-12-07	1963	29.5934	42.2998	38.7351	3.56468	9.14168	12.7064	10.078	6.51335	2.62834	32.2218	0	M	0	1	0	1	0	1	0	1	0	0	www.jsc.nasa.gov/Bios/htmlbios/cernan-ea.html	https://en.wikipedia.org/wiki/Eugene_Cernan
23	Chaffee, Roger B.	1963-10-17	1935-02-15	Died Before Retirement	1967-01-27	Never Flew	Never Flew	1963	28.668										0	M	0	0	0	1	0	0	0	0	0	0	www.jsc.nasa.gov/Bios/htmlbios/chaffee-rb.html
24	Collins, Michael	1963-10-17	1930-10-31	1970-01-15	Alive (1/31/17)	1966-07-18	1969-07-16	1963	32.961	39.2088	38.7077	0.501027	5.74675	6.24778	3.49624	2.99521	2.75154	35.7125	0	M	0	0	0	1	0	1	0	1	0	0	www.jsc.nasa.gov/Bios/htmlbios/collins-m.html	https://en.wikipedia.org/wiki/Michael_Collins_(astronaut)
25	Cunningham, Walter	1963-10-17	1932-03-16	1971-08-01	Alive (1/31/17)	1968-10-11	1968-10-11	1963	31.5866	39.3758	36.5722	2.80356	4.98563	7.78919	2.80356	0	4.98563	36.5722	0	M	0	1	0	1	0	1	0	1	0	0	www.jsc.nasa.gov/Bios/htmlbios/cunningham-w.html	https://en.wikipedia.org/wiki/Walter_Cunningham	http://www.jsc.nasa.gov/history/oral_histories/CunninghamRW/CunninghamRW_5-24-99.htm
26	Eisele, Donn F.	1963-10-17	1930-06-23	1972-07-15	1987-12-02	1968-10-11	1968-10-11	1963	33.3169	42.0616	38.3025	3.75907	4.98563	8.7447	3.75907	0	4.98563	38.3025	0	M	0	1	0	1	0	1	0	1	0	0	www.jsc.nasa.gov/Bios/htmlbios/eisele-df.html	https://en.wikipedia.org/wiki/Donn_F._Eisele
27	Freeman, Theodore C.	1963-10-17	1930-02-18	Died Before Retirement	1964-10-31	Never Flew	Never Flew	1963	33.6591										0	M	0	1	0	1	0	0	0	0	0	0	www.jsc.nasa.gov/Bios/htmlbios/freeman-tc.html
28	Gordon, Richard F., Jr.	1963-10-17	1929-10-05	1972-01-01	Alive (1/31/17)	1969-11-14	1969-11-14	1963	34.0315	42.2396	40.1095	2.13005	6.07803	8.20808	2.13005	0	6.07803	40.1095	0	M	0	0	0	1	0	1	0	1	0	0	www.jsc.nasa.gov/Bios/htmlbios/gordon-rf.html	https://en.wikipedia.org/wiki/Richard_F._Gordon_Jr.
29	Schweickart, Russell L.	1963-10-17	1935-10-25	1979-07-01	Alive (1/31/17)	1969-03-03	1969-03-03	1963	27.9781	43.6824	33.3552	10.3272	5.37714	15.7043	10.3272	0	5.37714	33.3552	0	M	0	1	0	1	0	1	0	1	0	0	www.jsc.nasa.gov/Bios/htmlbios/schweickart-rl.html	http://www.nmspacemuseum.org/halloffame/detail.php?id=82	https://en.wikipedia.org/wiki/Rusty_Schweickart
30	Scott, David R.	1963-10-17	1932-06-06	1977-10-30	Alive (1/31/17)	1966-03-16	1971-07-26	1963	31.3621	45.399	39.1348	6.2642	7.77276	14.037	11.6249	5.36071	2.41205	33.7741	0	M	0	1	0	1	0	1	0	1	0	1	www.jsc.nasa.gov/Bios/htmlbios/scott-dr.html	https://en.wikipedia.org/wiki/David_Scott
31	Williams, Clifton C., Jr.	1963-10-17	1932-09-26	Died Before Retirement	1967-10-05	Never Flew	Never Flew	1963	31.0554										0	M	0	0	0	1	0	1	0	0	0	0	www.jsc.nasa.gov/Bios/htmlbios/williams-cc.html
32	Garriott, Owen K.	1965-06-28	1930-11-22	1986-06-15	Alive (1/31/17)	1973-05-14	1983-11-28	1965	34.5982	55.5619	53.0157	2.5462	18.4175	20.9637	13.0869	10.5407	7.8768	42.475	0	M	1	1	0	1	0	0	0	1	0	1	www.jsc.nasa.gov/Bios/htmlbios/garriott-ok.html	https://en.wikipedia.org/wiki/Owen_K._Garriott	https://en.wikipedia.org/wiki/Skylab
33	Gibson, Edward G.	1965-06-28	1936-11-08	1974-12-15	Alive (1/31/17)	1973-11-16	1973-11-16	1965	28.6352	38.0999	37.0212	1.07871	8.38604	9.46475	1.07871	0	8.38604	37.0212	0	M	1	1	0	0	1	1	0	1	0	0	www.jsc.nasa.gov/Bios/htmlbios/gibson-eg.html	https://en.wikipedia.org/wiki/Skylab_4	https://en.wikipedia.org/wiki/Edward_Gibson
34	Graveline, Duane E.	1965-06-28	1931-03-02	1965-08-18	2016-09-05	Never Flew	Never Flew	1965	34.3244	34.4641				0.13963					0	M	0	0	1	1	0	0	0	0	0	0	www.jsc.nasa.gov/Bios/htmlbios/graveline-de.html	https://en.wikipedia.org/wiki/Duane_Graveline
35	Kerwin, Joseph P.	1965-06-28	1932-02-19	1987-03-31	Alive (1/31/17)	1973-05-25	1973-05-25	1965	33.3552	55.1102	41.2621	13.848	7.90691	21.755	13.848	0	7.90691	41.2621	0	M	0	0	1	1	0	1	0	1	0	0	www.jsc.nasa.gov/Bios/htmlbios/kerwin-jp.html	https://en.wikipedia.org/wiki/Joseph_P._Kerwin
36	Michel, F. Curtis	1965-06-28	1934-06-05	1969-09-15	2015-02-26	Never Flew	Never Flew	1965	31.0637	35.2799				4.21629					0	M	1	0	0	1	0	0	0	0	0	0	www.jsc.nasa.gov/Bios/htmlbios/michel-fc.pdf	https://en.wikipedia.org/wiki/Curt_Michel
37	Schmitt, Harrison H.	1965-06-28	1935-07-03	1975-08-30	Alive (1/31/17)	1972-12-06	1972-12-07	1965	29.9877	40.1588	37.4319	2.7269	7.44422	10.1711	2.72964	0.00273785	7.44148	37.4292	0	M	1	0	0	0	0	0	0	1	0	0	www.jsc.nasa.gov/Bios/htmlbios/schmitt-hh.html	https://en.wikipedia.org/wiki/Harrison_Schmitt
38	Brand, Vance D.	1966-04-04	1931-05-09	2008-01-15	Alive (1/31/17)	1975-07-15	1990-12-02	1966	34.9049	76.6872	59.5674	17.1198	24.6626	41.7823	32.5038	15.384	9.27858	44.1834	0	M	0	1	0	1	0	1	0	1	0	0	www.jsc.nasa.gov/Bios/htmlbios/brand.html	https://en.wikipedia.org/wiki/Vance_D._Brand
39	Bull, John S.	1966-04-04	1934-09-25	1968-07-16	2008-08-11	Never Flew	Never Flew	1966	31.5236	33.807				2.28337					0	M	1	1	0	1	0	1	0	0	0	0	www.jsc.nasa.gov/Bios/htmlbios/bull-js.html	https://en.wikipedia.org/wiki/John_S._Bull
40	Carr, Gerald P.	1966-04-04	1932-08-22	1977-06-25	Alive (1/31/17)	1973-11-16	1973-11-16	1966	33.6153	44.8405	41.2348	3.60575	7.61944	11.2252	3.60575	0	7.61944	41.2348	0	M	0	1	0	1	0	0	0	0	0	0	www.jsc.nasa.gov/Bios/htmlbios/carr-gp.html	https://en.wikipedia.org/wiki/Gerald_P._Carr
41	Duke, Charles M., Jr.	1966-04-04	1935-10-03	1976-01-01	Alive (1/31/17)	1972-04-16	1972-04-16	1966	30.5024	40.2464	36.5366	3.70979	6.03422	9.74401	3.70979	0	6.03422	36.5366	0	M	0	1	0	1	0	1	0	1	0	0	www.jsc.nasa.gov/Bios/htmlbios/duke-cm.html	https://en.wikipedia.org/wiki/Charles_Duke
42	Engle, Joe H.	1966-04-04	1932-08-26	1986-11-28	Alive (1/31/17)	1981-11-12	1985-08-27	1966	33.6044	54.256	53.0021	1.25394	19.3977	20.6516	5.04312	3.78919	15.6085	49.2129	0	M	0	0	0	1	0	1	0	1	0	0	http://en.wikipedia.org/wiki/Joe_Engle	http://www.jsc.nasa.gov/Bios/htmlbios/engle-jh.html
43	Evans, Ronald E.	1966-04-04	1933-11-10	1977-03-15	1990-04-07	1972-12-06	1972-12-07	1966	32.397	43.3429	39.0746	4.26831	6.67762	10.9459	4.27105	0.00273785	6.67488	39.0719	0	M	0	1	0	1	0	1	0	1	0	0	www.jsc.nasa.gov/Bios/htmlbios/evans-re.html	https://en.wikipedia.org/wiki/Ronald_Evans_(astronaut)
44	Givens, Edward G., Jr.	1966-04-04	1930-01-05	Died Before Retirement	1967-06-06	Never Flew	Never Flew	1966	36.2437										0	M	0	0	0	1	0	0	0	0	0	0	www.jsc.nasa.gov/Bios/htmlbios/givens-eg.html	https://en.wikipedia.org/wiki/Edward_Givens
45	Haise, Fred W., Jr.	1966-04-04	1933-11-14	1979-06-29	Alive (1/31/17)	1970-04-11	1970-04-11	1966	32.386	45.6208	36.4052	9.21561	4.01916	13.2348	9.21561	0	4.01916	36.4052	0	M	0	0	0	1	1	1	0	1	0	0	www.jsc.nasa.gov/Bios/htmlbios/haise-fw.html	https://en.wikipedia.org/wiki/Fred_Haise
46	Irwin, James B.	1966-04-04	1930-03-17	1972-07-31	1991-08-08	1971-07-26	1971-07-26	1966	36.0493	42.3737	41.358	1.01574	5.30869	6.32444	1.01574	0	5.30869	41.358	0	M	0	1	0	1	0	1	0	1	0	0	www.jsc.nasa.gov/Bios/htmlbios/irwin-jb.html	https://en.wikipedia.org/wiki/Apollo_15	https://en.wikipedia.org/wiki/James_Irwin
47	Lind, Don L.	1966-04-04	1930-05-18	1986-04-15	Alive (1/31/17)	1985-04-29	1985-04-29	1966	35.8795	55.9097	54.9487	0.960986	19.0691	20.0301	0.960986	0	19.0691	54.9487	0	M	1	0	0	1	1	1	0	0	0	1	www.jsc.nasa.gov/Bios/htmlbios/lind-dl.html	https://en.wikipedia.org/wiki/Don_L._Lind
48	Lousma, Jack R.	1966-04-04	1936-02-29	1983-10-01	Alive (1/31/17)	1973-07-28	1982-03-22	1966	30.0945	47.5866	46.0589	1.52772	15.9644	17.4921	10.1766	8.64887	7.31554	37.41	0	M	0	1	0	1	0	1	0	1	0	0	www.jsc.nasa.gov/Bios/htmlbios/lousma-jr.html	https://en.wikipedia.org/wiki/Jack_R._Lousma
49	Mattingly, Thomas K., II	1966-04-04	1936-03-17	1985-06-15	Alive (1/31/17)	1972-04-16	1985-01-24	1966	30.0479	49.2457	48.8569	0.388775	18.809	19.1978	13.1636	12.7748	6.03422	36.0821	0	M	0	0	0	1	0	0	0	1	0	0	www.jsc.nasa.gov/Bios/htmlbios/mattingly-tk.html	https://en.wikipedia.org/wiki/Ken_Mattingly
50	McCandless, Bruce, II	1966-04-04	1937-06-08	1990-08-31	Alive (1/31/17)	1984-02-03	1990-04-24	1966	28.8214	53.2293	52.8761	0.353183	24.0548	24.4079	6.57358	6.2204	17.8344	46.6557	0	M	0	1	0	1	0	0	0	0	0	1	www.jsc.nasa.gov/Bios/htmlbios/mccandless-b.html	https://en.wikipedia.org/wiki/Bruce_McCandless_II
51	Mitchell, Edgar D.	1966-04-04	1930-09-17	1972-10-01	2016-02-04	1971-01-31	1971-01-31	1966	35.5455	42.0397	40.3723	1.66735	4.82683	6.49418	1.66735	0	4.82683	40.3723	0	M	1	0	0	1	0	1	0	1	0	0	www.jsc.nasa.gov/Bios/htmlbios/mitchell-ed.html	https://en.wikipedia.org/wiki/Edgar_Mitchell
52	Pogue, William R.	1966-04-04	1930-01-23	1975-09-01	2014-03-03	1973-11-16	1973-11-16	1966	36.1944	45.6044	43.8138	1.79055	7.61944	9.40999	1.79055	0	7.61944	43.8138	0	M	0	1	0	1	0	1	0	1	0	0	www.jsc.nasa.gov/Bios/htmlbios/pogue-wr.html	https://en.wikipedia.org/wiki/Skylab_4	https://en.wikipedia.org/wiki/William_R._Pogue
53	Roosa, Stuart A.	1966-04-04	1933-08-16	1976-02-01	1994-12-12	1971-01-31	1971-01-31	1966	32.6324	42.4613	37.4593	5.00205	4.82683	9.82888	5.00205	0	4.82683	37.4593	0	M	0	0	0	1	0	1	0	1	0	0	www.jsc.nasa.gov/Bios/htmlbios/roosa-sa.html	https://en.wikipedia.org/wiki/Stuart_Roosa
54	Swigert, John L., Jr.	1966-04-04	1931-08-30	1977-08-15	1982-12-27	1970-04-11	1970-04-11	1966	34.5955	45.9603	38.6146	7.34565	4.01916	11.3648	7.34565	0	4.01916	38.6146	0	M	0	1	0	1	0	1	0	1	0	0	www.jsc.nasa.gov/Bios/htmlbios/swigert-jl.html	https://en.wikipedia.org/wiki/Jack_Swigert
55	Weitz, Paul J.	1966-04-04	1932-07-25	1994-05-15	Alive (1/31/17)	1973-05-25	1983-04-04	1966	33.692	61.8042	50.6913	11.1129	16.9993	28.1123	20.9719	9.859	7.14031	40.8323	0	M	0	1	0	1	0	1	0	1	0	0	www.jsc.nasa.gov/Bios/htmlbios/weitz-pj.html	https://en.wikipedia.org/wiki/Paul_J._Weitz
56	Worden, Alfred M.	1966-04-04	1932-02-07	1975-09-01	Alive (1/31/17)	1971-07-26	1971-07-26	1966	34.1547	43.5647	39.4634	4.1013	5.30869	9.40999	4.1013	0	5.30869	39.4634	0	M	0	1	0	1	0	1	0	1	0	0	www.jsc.nasa.gov/Bios/htmlbios/worden-am.html	https://en.wikipedia.org/wiki/Alfred_Worden; https://en.wikipedia.org/wiki/Apollo_15
57	Lawrence, Robert H., Jr.	1967-08-01	1935-10-02	Died Before Retirement	1967-12-08	Never Flew	Never Flew	1967	31.8303										0	M	1	0	0	1	0	1	0	0	0	1	https://en.wikipedia.org/wiki/Robert_Henry_Lawrence,_Jr.	http://www.nbcnews.com/id/7018497/#.WDxk5tUrK70
58	Allen, Joseph P.	1967-08-11	1937-06-27	1985-07-01	Alive (1/31/17)	1982-11-11	1984-11-08	1967	30.1218	48.011	47.3676	0.643395	17.2457	17.8891	2.63655	1.99316	15.2526	45.3744	0	M	1	1	0	0	0	0	0	0	0	1	http://www.jsc.nasa.gov/Bios/htmlbios/allen-jp.html	https://en.wikipedia.org/wiki/Joseph_P._Allen
59	Chapman, Philip K.	1967-08-11	1935-03-05	1972-07-15	Alive (1/31/17)	Never Flew	Never Flew	1967	32.4353	37.3634				4.92813					0	M	1	1	0	0	0	0	0	0	0	0	http://www.jsc.nasa.gov/Bios/htmlbios/chapman-pk.html	https://en.wikipedia.org/wiki/Philip_K._Chapman
60	England, Anthony W.	1967-08-11	1942-05-15	1988-08-31	Alive (1/31/17)	1985-07-29	1985-07-29	1967	25.2402	46.2971	43.206	3.09103	17.9658	21.0568	3.09103	0	17.9658	43.206	0	M	1	1	0	0	0	0	0	0	0	1	www.jsc.nasa.gov/Bios/htmlbios/england-aw.html
61	Henize, Karl G.	1967-08-11	1926-10-17	1986-04-15	1993-10-05	1985-07-29	1985-07-29	1967	40.8159	59.4935	58.7817	0.711841	17.9658	18.6776	0.711841	0	17.9658	58.7817	0	M	1	1	0	0	0	0	0	0	0	1	www.jsc.nasa.gov/Bios/htmlbios/henize.html	https://en.wikipedia.org/wiki/Karl_Gordon_Henize
62	Holmquest, Donald L.	1967-08-11	1939-04-07	1973-09-15	Alive (1/31/17)	Never Flew	Never Flew	1967	28.345	34.4422				6.09719					0	M	1	0	1	0	0	0	0	0	0	0	www.jsc.nasa.gov/Bios/htmlbios/holmquest-dl.html
63	Lenoir, William B.	1967-08-11	1939-03-14	1992-04-15	2010-08-26	1982-11-11	1982-11-11	1967	28.4107	53.0897	43.6632	9.42642	15.2526	24.679	9.42642	0	15.2526	43.6632	0	M	1	1	0	0	0	0	0	0	0	1	www.jsc.nasa.gov/Bios/htmlbios/lenoir-wb.html	https://en.wikipedia.org/wiki/Donald_Holmquest
64	Llewellyn, John A.	1967-08-11	1933-04-22	1968-09-15	2013-07-02	Never Flew	Never Flew	1967	34.3025	35.4004				1.09788					0	M	1	0	0	0	0	0	0	0	0	0	www.jsc.nasa.gov/Bios/htmlbios/llewellyn-ja.html
65	Musgrave, Story	1967-08-11	1935-08-19	1997-09-02	Alive (1/31/17)	1983-04-04	1996-11-19	1967	31.9781	62.0397	61.2539	0.785763	29.2758	30.0616	14.4148	13.629	15.6468	47.6249	0	M	0	1	1	1	0	1	0	0	0	1	www.jsc.nasa.gov/Bios/htmlbios/musgrave.html
66	O'Leary, Brian T.	1967-08-11	1940-01-27	1968-04-23	2011-07-28	Never Flew	Never Flew	1967	27.5373	28.2382				0.70089					0	M	1	1	0	0	0	0	0	0	0	0	www.jsc.nasa.gov/Bios/htmlbios/oleary-bt.html	https://en.wikipedia.org/wiki/Brian_O'Leary
67	Parker, Robert A. R.	1967-08-11	1936-12-14	2005-08-31	Alive (1/31/17)	1983-11-28	1990-12-02	1967	30.6557	68.7118	53.9658	14.7461	23.3101	38.0561	21.7577	7.01164	16.2984	46.9541	0	M	1	0	0	0	0	0	0	0	0	1	www.jsc.nasa.gov/Bios/htmlbios/parker-rar.html
68	Thornton, William E.	1967-08-11	1929-04-14	1994-05-31	Alive (1/31/17)	1983-08-30	1985-04-29	1967	38.3244	65.128	56.0411	9.08693	17.7166	26.8036	10.7515	1.66461	16.052	54.3765	0	M	0	0	1	1	0	0	0	0	0	1	www.jsc.nasa.gov/Bios/htmlbios/thornton-w.html	https://en.wikipedia.org/wiki/William_E._Thornton	https://en.wikipedia.org/wiki/STS-8
69	Bobko, Karol J.	1969-08-14	1937-12-23	1988-01-15	Alive (1/31/17)	1983-04-04	1985-10-03	1969	31.6413	50.0616	47.7782	2.28337	16.1369	18.4203	4.78303	2.49966	13.6372	45.2786	0	M	0	1	0	1	0	0	0	1	0	0	http://www.jsc.nasa.gov/Bios/htmlbios/bobko-kj.html	https://en.wikipedia.org/wiki/Karol_J._Bobko
70	Crippen, Robert L.	1969-08-14	1937-09-11	1995-01-15	Alive (1/31/17)	1981-04-12	1984-10-05	1969	31.9233	57.3443	47.0664	10.2779	15.1431	25.4209	13.7604	3.48255	11.6605	43.5838	0	M	0	0	0	1	0	1	0	1	0	0	http://www.jsc.nasa.gov/Bios/htmlbios/crippen-rl.html	https://en.wikipedia.org/wiki/Robert_Crippen
71	Fullerton, Charles G.	1969-08-14	1936-10-11	2007-12-31	2013-08-21	1982-03-22	1985-07-29	1969	32.8405	71.2197	48.7967	22.423	15.9562	38.3792	25.7769	3.35387	12.6023	45.4428	0	M	0	1	0	1	0	1	0	1	0	0	https://www.nasa.gov/centers/armstrong/news/Biographies/Pilots/bd-dfrc-p004.html	http://en.wikipedia.org/wiki/C._Gordon_Fullerton
72	Hartsfield, Henry W., Jr.	1969-08-14	1933-11-21	1998-03-15	2014-07-17	1982-06-27	1985-10-30	1969	35.729	64.3121	51.9398	12.3723	16.2108	28.5832	15.7153	3.34292	12.8679	48.5969	0	M	0	1	0	1	0	1	0	1	0	0	http://www.jsc.nasa.gov/Bios/htmlbios/hartsfield-hw.html
73	Overmyer, Robert F.	1969-08-14	1936-07-14	1986-05-15	1996-03-22	1982-11-11	1985-04-29	1969	33.0842	49.8344	48.7912	1.04312	15.707	16.7502	3.50719	2.46407	13.243	46.3272	0	M	0	1	0	1	0	1	0	1	0	0	http://www.jsc.nasa.gov/Bios/htmlbios/overmyer.html
74	Peterson, Donald H.	1969-08-14	1933-10-22	1984-11-15	Alive (1/31/17)	1983-04-04	1983-04-04	1969	35.8111	51.0664	49.4483	1.61807	13.6372	15.2553	1.61807	0	13.6372	49.4483	0	M	0	1	0	1	0	0	0	0	0	1	http://www.jsc.nasa.gov/Bios/htmlbios/peterson-dh.html	https://en.wikipedia.org/wiki/Donald_H._Peterson
75	Truly, Richard H.	1969-08-14	1937-11-12	1992-05-15	Alive (1/31/17)	1977-08-12	1983-08-30	1969	31.7536	54.5051	45.796	8.7091	14.0424	22.7515	14.757	6.04791	7.99452	39.7481	0	M	0	0	0	1	0	1	0	1	0	0	http://www.jsc.nasa.gov/Bios/htmlbios/truly-rh.html	http://en.wikipedia.org/wiki/Richard_H._Truly	https://en.wikipedia.org/wiki/NASA_Astronaut_Group_7
76	Bluford, Guion S., Jr.	1978-01-16	1942-11-22	1993-07-15	Alive (1/31/17)	1983-08-30	1992-12-02	1978	35.1513	50.6448	50.0287	0.616016	14.8775	15.4935	9.87543	9.25941	5.61807	40.7693	0	M	1	1	0	1	0	0	0	0	0	1	http://www.jsc.nasa.gov/Bios/htmlbios/bluford-gs.html
77	Brandenstein, Daniel C.	1978-01-16	1943-01-17	1992-10-15	Alive (1/31/17)	1983-08-30	1992-05-07	1978	34.9979	49.744	49.3032	0.440794	14.3053	14.7461	9.12799	8.6872	5.61807	40.616	0	M	0	0	0	1	0	1	0	1	0	0	http://www.jsc.nasa.gov/Bios/htmlbios/brandenstein-dc.html	https://en.wikipedia.org/wiki/Guion_Bluford
78	Buchli, James F.	1978-01-16	1945-06-20	1992-09-01	Alive (1/31/17)	1985-01-24	1991-09-12	1978	32.5749	47.2005	46.2286	0.971937	13.6537	14.6256	7.60301	6.63107	7.02259	39.5975	0	M	0	1	0	1	0	0	0	0	0	1	http://www.jsc.nasa.gov/Bios/htmlbios/buchli-jf.html	https://en.wikipedia.org/https://en.wikipedia.org/wiki/James_Buchli
79	Coats, Michael L.	1978-01-16	1946-01-16	1991-08-01	Alive (1/31/17)	1984-08-30	1991-04-28	1978	32	45.5387	45.2786	0.260096	13.2786	13.5387	6.91855	6.65845	6.62012	38.6201	0	M	0	1	0	1	0	1	0	1	0	0	http://www.jsc.nasa.gov/Bios/htmlbios/coats-ml.html
80	Covey, Richard O.	1978-01-16	1946-08-01	1994-08-01	Alive (1/31/17)	1985-08-27	1993-12-02	1978	31.4606	48	47.3374	0.66256	15.8768	16.5394	8.92813	8.26557	7.61123	39.0719	0	M	0	1	0	1	0	1	0	1	0	0	http://www.jsc.nasa.gov/Bios/htmlbios/covey-ro.html	https://en.wikipedia.org/wiki/NASA_Astronaut_Group_8
81	Creighton, John O.	1978-01-16	1943-04-28	1992-07-01	Alive (1/31/17)	1985-06-17	1991-09-12	1978	34.7214	49.1773	48.3751	0.80219	13.6537	14.4559	7.03901	6.23682	7.41684	42.1383	0	M	0	1	0	1	0	1	0	1	0	0	http://www.jsc.nasa.gov/Bios/htmlbios/creighton-jo.html	https://en.wikipedia.org/wiki/NASA_Astronaut_Group_8
82	Fabian, John M.	1978-01-16	1939-01-28	1986-01-01	Alive (1/31/17)	1983-06-18	1985-06-17	1978	38.9678	46.9268	46.3847	0.542094	7.41684	7.95893	2.54073	1.99863	5.41821	44.386	0	M	1	1	0	1	0	0	0	0	0	1	http://www.jsc.nasa.gov/Bios/htmlbios/fabian-jm.html
83	Fisher, Anna L.	1978-01-16	1949-08-24	Current NASA	Alive (1/31/17)	1984-11-08	1984-11-08	1978	28.397		35.2088		6.81177			0	6.81177	35.2088	0	F	0	1	1	0	0	0	1	0	0	1	http://www.jsc.nasa.gov/Bios/htmlbios/fisher-a.html
84	Gardner, Dale A.	1978-01-16	1948-11-08	1986-10-15	2014-02-19	1983-08-30	1984-11-08	1978	29.1882	37.9329	36	1.93292	6.81177	8.7447	3.12663	1.1937	5.61807	34.8063	0	M	0	0	0	1	0	0	0	0	0	1	http://www.jsc.nasa.gov/Bios/htmlbios/gardner-da.html
85	Gibson, Robert L.	1978-01-16	1946-10-30	1996-11-15	Alive (1/31/17)	1984-02-03	1995-06-27	1978	31.2142	50.0452	48.6571	1.38809	17.4428	18.8309	12.783	11.3949	6.04791	37.2621	0	M	0	0	0	1	0	1	0	1	0	0	http://www.jsc.nasa.gov/Bios/htmlbios/gibson.html	http://www.jsc.nasa.gov/history/oral_histories/GibsonRL/GibsonRL_11-1-13.htm
86	Gregory, Frederick D.	1978-01-16	1941-01-07	2005-10-15	Alive (1/31/17)	1985-04-29	1991-11-24	1978	37.024	64.7693	50.8775	13.8919	13.8535	27.7454	20.4627	6.57084	7.28268	44.3066	0	M	0	1	0	1	0	1	0	1	0	0	http://www.jsc.nasa.gov/Bios/htmlbios/gregory-fd.html	https://en.wikipedia.org/wiki/Frederick_D._Gregory
87	Griggs, S. David	1978-01-16	1939-09-07	Died Before Retirement	1989-06-17	1985-04-12	1985-04-12	1978	38.36		45.5962		7.23614			0	7.23614	45.5962	0	M	0	1	0	1	1	0	0	0	0	1	http://www.jsc.nasa.gov/Bios/htmlbios/griggs.html
88	Hart, Terry J.	1978-01-16	1946-10-27	1984-06-15	Alive (1/31/17)	1984-04-06	1984-04-06	1978	31.2225	37.6345	37.4428	0.19165	6.2204	6.41205	0.19165	0	6.2204	37.4428	0	M	0	1	0	1	0	0	0	0	0	1	http://www.jsc.nasa.gov/Bios/htmlbios/hart-tj.html	https://en.wikipedia.org/wiki/Terry_Hart
89	Hauck, Frederick H.	1978-01-16	1941-04-11	1990-06-01	Alive (1/31/17)	1983-06-18	1988-09-29	1978	36.7666	49.1389	47.4689	1.67009	10.7023	12.3723	6.95414	5.28405	5.41821	42.1848	0	M	0	1	0	1	0	1	0	1	0	0	http://www.jsc.nasa.gov/Bios/htmlbios/hauck-fh.html
90	Hawley, Steven A.	1978-01-16	1951-12-12	2008-05-15	Alive (1/31/17)	1984-08-30	1999-07-22	1978	26.0972	56.4244	47.6085	8.81588	21.5113	30.3272	23.707	14.8912	6.62012	32.7173	0	M	1	0	0	0	0	0	0	0	0	1	http://www.jsc.nasa.gov/Bios/htmlbios/hawley.html
91	Hoffman, Jeffrey A.	1978-01-16	1944-11-02	2001-08-15	Alive (1/31/17)	1985-04-12	1996-02-22	1978	33.2047	56.783	51.3046	5.47844	18.0999	23.5784	16.3422	10.8638	7.23614	40.4408	0	M	1	1	0	0	0	0	0	0	0	1	http://www.jsc.nasa.gov/Bios/htmlbios/hoffman.html
92	Lucid, Shannon W.	1978-01-16	1943-01-14	2012-01-31	Alive (1/31/17)	1985-06-17	1996-03-22	1978	35.0062	69.0459	53.1855	15.8604	18.1793	34.0397	26.6229	10.7625	7.41684	42.423	0	F	1	1	0	0	0	0	0	0	1	1	http://www.jsc.nasa.gov/Bios/htmlbios/lucid.html	https://en.wikipedia.org/wiki/Shannon_Lucid
93	McBride, Jon A.	1978-01-16	1943-08-14	1989-05-12	Alive (1/31/17)	1984-10-05	1984-10-05	1978	34.4257	45.744	41.1444	4.59959	6.71869	11.3183	4.59959	0	6.71869	41.1444	0	M	0	0	0	1	0	1	0	1	0	0	http://www.jsc.nasa.gov/Bios/htmlbios/mcbride-ja.html	https://en.wikipedia.org/wiki/Jon_McBride
94	McNair, Ronald E.	1978-01-16	1950-10-21	Died Before Retirement	1986-01-28	1984-02-03	1986-01-28	1978	27.2389		35.2717		8.03285			1.98494	6.04791	33.2868	0	M	1	0	0	0	0	0	0	0	0	1	http://www.jsc.nasa.gov/Bios/htmlbios/mcnair.html
95	Mullane, Richard M.	1978-01-16	1945-09-10	1990-09-15	Alive (1/31/17)	1984-08-30	1990-02-28	1978	32.3504	45.013	44.4682	0.544832	12.1177	12.6626	6.04244	5.4976	6.62012	38.9706	0	M	0	1	0	1	0	0	0	0	0	1	http://www.jsc.nasa.gov/Bios/htmlbios/mullane-rm.html
96	Nagel, Steven R.	1978-01-16	1946-10-27	1995-03-01	2014-08-21	1985-06-17	1993-04-26	1978	31.2225	48.3422	46.4969	1.84531	15.2745	17.1198	9.70294	7.85763	7.41684	38.6393	0	M	0	1	0	1	0	1	0	1	0	1	http://www.jsc.nasa.gov/Bios/htmlbios/nagel.html	https://en.wikipedia.org/wiki/Steven_R._Nagel
97	Nelson, George D.	1978-01-16	1942-09-29	1989-06-30	Alive (1/31/17)	1986-01-12	1986-01-12	1978	35.2991	46.7515	43.2882	3.46338	7.98905	11.4524	3.46338	0	7.98905	43.2882	0	M	0	0	0	1	0	0	0	0	0	1	http://www.jsc.nasa.gov/Bios/htmlbios/nelson-b.html
98	Onizuka, Ellison S.	1978-01-16	1946-06-24	Died Before Retirement	1986-01-28	1985-01-24	1986-01-28	1978	31.5647		39.5975		8.03285			1.01027	7.02259	38.5873	0	M	0	1	0	1	0	0	0	0	0	1	http://www.jsc.nasa.gov/Bios/htmlbios/onizuka.html
99	Resnik, Judith A.	1978-01-16	1949-04-05	Died Before Retirement	1986-01-28	1984-08-30	1986-01-28	1978	28.783		36.8159		8.03285			1.41273	6.62012	35.4031	0	F	1	0	0	0	0	0	0	0	0	1	http://www.jsc.nasa.gov/Bios/htmlbios/resnik.html
100	Ride, Sally K.	1978-01-16	1951-05-26	1987-08-15	2012-07-23	1983-06-18	1984-10-05	1978	26.6448	36.2218	33.3634	2.85832	6.71869	9.577	4.1588	1.30048	5.41821	32.063	0	F	1	1	0	0	0	0	0	0	0	1	http://www.jsc.nasa.gov/Bios/htmlbios/ride-sk.html	https://en.wikipedia.org/wiki/Sally_Ride
101	Scobee, Francis R.	1978-01-16	1939-05-19	Died Before Retirement	1986-01-28	1984-04-06	1986-01-28	1978	38.6639		46.6968		8.03285			1.81246	6.2204	44.8843	0	M	0	0	0	1	0	1	0	1	0	0	http://www.jsc.nasa.gov/Bios/htmlbios/scobee.html
102	Seddon, Margaret Rhea	1978-01-16	1947-11-08	1997-11-15	Alive (1/31/17)	1985-04-12	1993-10-18	1978	30.1903	50.0205	45.9439	4.07666	15.7536	19.8303	12.5941	8.51745	7.23614	37.4264	0	F	0	0	1	0	0	0	0	0	0	1	http://www.jsc.nasa.gov/Bios/htmlbios/seddon.html	https://en.wikipedia.org/wiki/Margaret_Rhea_Seddon
103	Shaw, Brewster H., Jr.	1978-01-16	1945-05-16	1996-01-15	Alive (1/31/17)	1983-11-28	1989-08-08	1978	32.6708	50.6667	44.23	6.43669	11.5592	17.9959	12.1314	5.69473	5.86448	38.5352	0	M	0	1	0	1	0	1	0	1	0	0	http://www.jsc.nasa.gov/Bios/htmlbios/shaw-bh.html	https://en.wikipedia.org/wiki/Brewster_H._Shaw#External_links
104	Shriver, Loren J.	1978-01-16	1944-09-23	1993-05-15	Alive (1/31/17)	1985-01-24	1992-07-31	1978	33.3142	48.6407	47.8522	0.788501	14.538	15.3265	8.3039	7.5154	7.02259	40.3368	0	M	0	1	0	1	0	1	0	1	0	0	http://www.nasa.gov/centers/kennedy/about/biographies/shriver.html	http://en.wikipedia.org/wiki/Loren_Shriver; https://en.wikipedia.org/wiki/STS-46
105	Stewart, Robert L.	1978-01-16	1942-08-13	1986-09-15	Alive (1/31/17)	1984-02-03	1985-10-03	1978	35.4278	44.0903	43.1403	0.950034	7.71253	8.66256	2.61465	1.66461	6.04791	41.4757	0	M	0	1	0	1	0	0	0	0	0	1	http://www.jsc.nasa.gov/Bios/htmlbios/stewart-rl.html	https://en.wikipedia.org/wiki/Robert_L._Stewart
106	Sullivan, Kathryn D.	1978-01-16	1951-10-03	1993-06-15	Alive (1/31/17)	1984-10-05	1992-03-24	1978	26.2888	41.7002	40.4736	1.22656	14.1848	15.4114	8.69268	7.46612	6.71869	33.0075	0	F	1	0	0	0	0	0	0	0	0	1	http://www.jsc.nasa.gov/Bios/htmlbios/sullivan-kd.html	https://en.wikipedia.org/wiki/Kathryn_D._Sullivan
107	Thagard, Norman E.	1978-01-16	1943-07-03	1995-12-15	Alive (1/31/17)	1983-06-08	1995-03-14	1978	34.5407	52.4517	51.6961	0.755647	17.1554	17.911	12.5202	11.7645	5.39083	39.9316	0	M	0	1	1	1	0	0	0	0	1	1	http://www.jsc.nasa.gov/Bios/htmlbios/thagard.html
108	Van Hoften, James D. A.	1978-01-16	1944-06-11	1986-08-15	Alive (1/31/17)	1984-04-06	1985-08-27	1978	33.5989	42.1766	41.2101	0.966461	7.61123	8.57769	2.35729	1.39083	6.2204	39.8193	0	M	1	1	0	1	0	0	0	0	0	1	http://www.jsc.nasa.gov/Bios/htmlbios/vanhoften-jda.html	https://en.wikipedia.org/wiki/James_van_Hoften
109	Walker, David M.	1978-01-16	1944-05-20	1996-04-15	2001-04-23	1984-11-08	1995-09-07	1978	33.6591	51.9042	51.2991	0.605065	17.64	18.245	11.4333	10.8282	6.81177	40.4709	0	M	0	0	0	1	0	1	0	1	0	0	http://www.jsc.nasa.gov/Bios/htmlbios/walker.html
110	Williams, Donald E.	1978-01-16	1942-02-13	1990-03-15	2016-02-23	1985-04-12	1989-10-18	1978	35.9233	48.0821	47.6769	0.405202	11.7536	12.1588	4.92266	4.51745	7.23614	43.1595	0	M	0	0	0	1	0	1	0	1	0	0	http://www.jsc.nasa.gov/Bios/htmlbios/williams-de.html
111	Bolden, Charles F., Jr.	1980-05-19	1946-08-19	1994-06-27	Alive (1/31/17)	1986-01-12	1994-02-03	1980	33.7495	47.8549	47.4606	0.394251	13.7112	14.1054	8.45448	8.06023	5.65092	39.4004	0	M	0	1	0	1	0	1	1	1	0	0	http://www.jsc.nasa.gov/Bios/htmlbios/bolden-cf.html	https://en.wikipedia.org/wiki/Charles_Bolden
112	Bagian, James P.	1980-05-29	1952-02-22	1995-08-15	Alive (1/31/17)	1989-03-13	1991-06-05	1980	28.2656	43.4771	39.2827	4.19439	11.0171	15.2115	6.423	2.22861	8.7885	37.0541	0	M	0	0	1	1	0	0	0	0	0	1	http://www.jsc.nasa.gov/Bios/htmlbios/bagian.html	https://en.wikipedia.org/wiki/James_P._Bagian
113	Blaha, John E.	1980-05-29	1942-08-26	1997-09-26	Alive (1/31/17)	1989-03-13	1996-09-16	1980	37.7577	55.0856	54.0589	1.02669	16.3012	17.3279	8.53936	7.51266	8.7885	46.5462	0	M	0	1	0	1	0	1	0	1	1	1	http://www.jsc.nasa.gov/Bios/htmlbios/blaha.html	http://history.nasa.gov/SP-4225/nasa3/nasa3.htm
114	Bridges, Roy D., Jr.	1980-05-29	1943-07-19	1997-03-01	Alive (1/31/17)	1985-07-29	1985-07-29	1980	36.8624	53.6181	42.0287	11.5893	5.16632	16.7556	11.5893	0	5.16632	42.0287	0	M	0	1	0	1	0	1	0	1	0	0	http://www.jsc.nasa.gov/Bios/htmlbios/bridges.html	https://en.wikipedia.org/wiki/Roy_D._Bridges_Jr.
115	Chang-Díaz, Franklin R.	1980-05-29	1950-04-05	2005-07-15	Alive (1/31/17)	1986-01-12	2002-06-05	1980	30.1492	55.2772	52.167	3.1102	22.0178	25.128	19.5044	16.3943	5.62355	35.7728	0	M	1	0	0	0	0	0	0	0	0	1	http://www.jsc.nasa.gov/Bios/htmlbios/chang.html	http://www.spacefacts.de/bios/astronauts/english/chang-diaz_franklin.htm
116	Cleave, Mary L.	1980-05-29	1947-02-05	2007-02-15	Alive (1/31/17)	1985-11-26	1989-05-04	1980	33.3114	60.0274	42.2423	17.7851	8.93087	26.7159	21.2211	3.436	5.49487	38.8063	0	F	1	1	0	0	0	0	0	0	0	1	http://www.jsc.nasa.gov/Bios/htmlbios/cleave-ml.html	https://en.wikipedia.org/wiki/Mary_L._Cleave
117	Dunbar, Bonnie J.	1980-05-29	1949-03-03	2005-09-15	Alive (1/31/17)	1985-10-30	1998-01-22	1980	31.2389	56.5366	48.8898	7.64682	17.6509	25.2977	19.8768	12.23	5.42094	36.6598	0	F	1	1	0	0	1	0	0	0	0	1	http://www.jsc.nasa.gov/Bios/htmlbios/dunbar.html	https://en.wikipedia.org/wiki/Bonnie_J._Dunbar
118	Fisher, William F.	1980-05-29	1946-04-01	1991-01-31	Alive (1/31/17)	1985-08-27	1985-08-27	1980	34.1602	44.835	39.4059	5.42916	5.24572	10.6749	5.42916	0	5.24572	39.4059	0	M	0	0	1	0	0	0	0	0	0	1	http://www.jsc.nasa.gov/Bios/htmlbios/fisher-wf.html	https://en.wikipedia.org/wiki/William_Frederick_Fisher	http://www.spacefacts.de/bios/astronauts/english/fisher_william.htm
119	Gardner, Guy S.	1980-05-29	1948-01-06	1991-06-15	Alive (1/31/17)	1988-12-02	1990-12-02	1980	32.3943	43.4387	42.9049	0.533881	10.5106	11.0445	2.53251	1.99863	8.51198	40.9062	0	M	0	1	0	1	0	1	0	1	0	0	http://www.jsc.nasa.gov/Bios/htmlbios/gardner-gs.html	https://en.wikipedia.org/wiki/Guy_Gardner_(astronaut)
120	Grabe, Ronald J.	1980-05-29	1945-06-13	1994-04-11	Alive (1/31/17)	1985-10-03	1993-06-21	1980	34.9596	48.8268	48.0219	0.804928	13.0623	13.8672	8.52019	7.71526	5.34702	40.3066	0	M	0	0	0	1	0	1	0	1	0	0	http://www.jsc.nasa.gov/Bios/htmlbios/grabe-rj.html	http://www.spacefacts.de/bios/astronauts/english/grabe_ronald.htm
121	Hilmers, David C.	1980-05-29	1950-01-28	1992-10-15	Alive (1/31/17)	1985-10-03	1992-01-22	1980	30.3326	42.7132	41.9822	0.731006	11.6496	12.3806	7.03354	6.30253	5.34702	35.6797	0	M	0	1	0	1	0	0	0	0	0	1	http://www.jsc.nasa.gov/Bios/htmlbios/hilmers-dc.html	https://en.wikipedia.org/wiki/David_C._Hilmers
122	Leestma, David C.	1980-05-29	1949-05-06	2014-05-30	Alive (1/31/17)	1984-10-05	1992-03-24	1980	31.0637	65.065	42.883	22.1821	11.8193	34.0014	29.6482	7.46612	4.35318	35.4168	0	M	0	1	0	1	0	0	0	0	0	1	http://www.jsc.nasa.gov/Bios/htmlbios/leestma.html	https://en.wikipedia.org/wiki/David_Leestma
123	Lounge, John M.	1980-05-29	1946-06-28	1991-06-20	2011-03-01	1985-08-27	1990-12-02	1980	33.9192	44.9774	44.4298	0.54757	10.5106	11.0582	5.81246	5.26489	5.24572	39.165	0	M	0	1	0	1	1	0	0	0	0	1	http://www.jsc.nasa.gov/Bios/htmlbios/lounge-jm.html	http://www.spacefacts.de/bios/astronauts/english/lounge_john.htm
124	O'Connor, Bryan D.	1980-05-29	1946-09-06	2011-08-15	Alive (1/31/17)	1985-11-26	1991-06-05	1980	33.7276	64.9391	44.7447	20.1944	11.0171	31.2115	25.7166	5.52225	5.49487	39.2225	0	M	0	1	0	1	0	1	0	1	0	0	http://www.jsc.nasa.gov/Bios/htmlbios/oconnor-bd.html	https://en.wikipedia.org/wiki/Bryan_D._O'Connor
125	Richards, Richard N.	1980-05-29	1946-08-24	1998-08-15	Alive (1/31/17)	1989-08-08	1994-09-09	1980	33.7632	51.9754	48.0438	3.93155	14.2806	18.2122	9.01848	5.08693	9.1937	42.9569	0	M	0	1	0	1	0	1	0	1	0	0	http://www.jsc.nasa.gov/Bios/htmlbios/richards.html	https://en.wikipedia.org/wiki/Richard_N._Richards
126	Ross, Jerry L.	1980-05-29	1948-01-20	2012-01-20	Alive (1/31/17)	1985-11-26	2002-04-08	1980	32.3559	64	54.2149	9.78508	21.859	31.6441	26.1492	16.3641	5.49487	37.8508	0	M	0	1	0	1	1	0	0	0	0	1	http://www.jsc.nasa.gov/Bios/htmlbios/ross.html	https://en.wikipedia.org/wiki/Jerry_L._Ross
127	Smith, Michael J.	1980-05-29	1945-04-30	Died Before Retirement	1986-01-28	1986-01-28	1986-01-28	1980	35.0801		40.7474		5.66735			0	5.66735	40.7474	0	M	0	1	0	1	0	1	0	1	0	0	http://www.jsc.nasa.gov/Bios/htmlbios/smith-michael.html
128	Spring, Sherwood C.	1980-05-29	1944-09-03	1988-08-15	Alive (1/31/17)	1985-11-26	1985-11-26	1980	35.7344	43.948	41.2293	2.71869	5.49487	8.21355	2.71869	0	5.49487	41.2293	0	M	0	1	0	1	0	0	0	0	0	1	http://www.jsc.nasa.gov/Bios/htmlbios/spring-sc.html	https://en.wikipedia.org/wiki/Sherwood_C._Spring
129	Springer, Robert C.	1980-05-29	1942-05-21	1990-12-15	Alive (1/31/17)	1989-03-13	1990-11-15	1980	38.0233	48.5695	48.4873	0.0821355	10.4641	10.5462	1.7577	1.67556	8.7885	46.8118	0	M	0	1	0	1	0	0	0	0	0	1	http://www.jsc.nasa.gov/Bios/htmlbios/springer-rc.html	https://en.wikipedia.org/wiki/Robert_C._Springer
130	Adamson, James C.	1984-05-23	1946-03-03	Not Applicable	Alive (1/31/17)	1989-08-08	1991-08-02	1984	38.2231		45.4155		7.19233			1.9822	5.21013	43.4333	0	M	0	1	0	1	1	0	0	0	0	1	http://www.jsc.nasa.gov/Bios/htmlbios/adamson-jc.html	https://en.wikipedia.org/wiki/James_C._Adamson
131	Baker, Ellen S.	1984-05-23	1953-04-27	2011-12-15	Alive (1/31/17)	1989-10-18	1995-06-27	1984	31.0719	58.6338	42.1656	16.4682	11.0938	27.5619	22.1574	5.68925	5.40452	36.4764	0	F	0	1	1	0	1	0	0	0	0	1	http://www.jsc.nasa.gov/Bios/htmlbios/baker-e.html	https://en.wikipedia.org/wiki/Ellen_S._Baker
132	Brown, Mark N.	1984-05-23	1951-11-18	1993-07-15	Alive (1/31/17)	1989-08-08	1991-09-12	1984	32.512	41.6564	39.8166	1.83984	7.30459	9.14442	3.93429	2.09446	5.21013	37.7221	0	M	0	1	0	1	1	0	0	0	0	1	http://www.jsc.nasa.gov/Bios/htmlbios/brown-mn.html	https://en.wikipedia.org/wiki/Mark_N._Brown
133	Cameron, Kenneth D.	1984-05-23	1949-11-29	2008-12-15	Alive (1/31/17)	1991-04-05	1995-11-12	1984	34.4805	59.0445	45.9521	13.0924	11.4716	24.564	17.6975	4.60507	6.86653	41.347	0	M	0	1	0	1	0	1	0	1	0	0	http://www.jsc.nasa.gov/Bios/htmlbios/cameron.html	https://en.wikipedia.org/wiki/Kenneth_D._Cameron
134	Carter, Manley Lanier, Jr.	1984-05-23	1947-08-15	Died Before Retirement	1991-04-05	1989-11-22	1989-11-22	1984	36.7721		42.2724		5.50034			0	5.50034	42.2724	0	M	0	0	1	1	0	0	0	0	0	1	http://www.jsc.nasa.gov/Bios/htmlbios/carter.html
135	Casper, John H.	1984-05-23	1943-07-09	Died Before Retirement	2008-12-18	1990-02-28	1996-05-19	1984	40.8734		52.8624		11.989			6.2204	5.76865	46.642	0	M	0	1	0	1	0	1	1	1	0	0	http://www.jsc.nasa.gov/Bios/htmlbios/casper.html	https://en.wikipedia.org/wiki/John_Casper; http://www.legacy.com/obituaries/gainesvilletimes/obituary.aspx?pid=121561617
136	Culbertson, Frank L., Jr.	1984-05-23	1949-05-15	2002-08-24	Alive (1/31/17)	1990-11-15	2001-11-10	1984	35.0226	53.2758	52.4901	0.785763	17.4675	18.2533	11.7728	10.987	6.48049	41.5031	0	M	0	0	0	1	0	1	0	1	1	1	http://www.jsc.nasa.gov/Bios/htmlbios/culberts.html	http://www.spacefacts.de/bios/astronauts/english/culbertson_frank.htm
137	Gutierrez, Sidney M.	1984-05-23	1951-06-27	1994-09-15	Alive (1/31/17)	1991-06-05	1994-04-09	1984	32.9062	43.2197	42.7844	0.435318	9.87817	10.3135	3.27995	2.84463	7.03354	39.9398	0	M	0	1	0	1	0	1	0	1	0	0	http://www.jsc.nasa.gov/Bios/htmlbios/gutierrez-sm.html	http://www.nmspacemuseum.org/halloffame/detail.php?id=124
138	Hammond, L. Blaine, Jr.	1984-05-23	1952-01-16	1998-02-23	Alive (1/31/17)	1991-04-28	1994-09-09	1984	32.3504	46.1054	42.6475	3.45791	10.2971	13.755	6.82546	3.36756	6.9295	39.2799	0	M	0	1	0	1	0	1	0	1	0	0	http://www.jsc.nasa.gov/Bios/htmlbios/hammond.html	https://en.wikipedia.org/wiki/STS-64
139	Ivins, Marsha, S.	1984-05-23	1951-04-15	2010-12-31	Alive (1/31/17)	1990-01-09	2001-02-07	1984	33.1061	59.7125	49.8179	9.89459	16.7118	26.6064	20.9747	11.0801	5.63176	38.7379	0	F	0	0	0	0	1	0	0	0	0	1	http://www.jsc.nasa.gov/Bios/htmlbios/ivins.html	https://en.wikipedia.org/wiki/Marsha_Ivins
140	Lee, Mark C.	1984-05-23	1952-08-14	2001-07-01	Alive (1/31/17)	1989-05-04	1997-02-21	1984	31.7728	48.8789	44.5229	4.35592	12.7502	17.1061	12.1588	7.80287	4.9473	36.7201	0	M	0	1	0	1	0	0	0	0	0	1	http://www.jsc.nasa.gov/Bios/htmlbios/lee.html	https://en.wikipedia.org/wiki/Mark_C._Lee
141	Low, G. David	1984-05-23	1956-02-19	1996-02-20	2008-03-15	1990-01-09	1993-06-21	1984	28.2574	40.0027	37.3361	2.66667	9.07871	11.7454	6.11362	3.44695	5.63176	33.8891	0	M	0	1	0	0	0	0	0	0	0	1	http://www.jsc.nasa.gov/Bios/htmlbios/low.html	http://www.spacefacts.de/bios/astronauts/english/low_david.htm
142	McCulley, Michael J.	1984-05-23	1943-08-04	1990-10-15	Alive (1/31/17)	1989-10-18	1989-10-18	1984	40.8022	47.1978	46.2067	0.991102	5.40452	6.39562	0.991102	0	5.40452	46.2067	0	M	0	1	0	1	0	1	0	1	0	0	http://www.jsc.nasa.gov/Bios/htmlbios/mcculley.html	https://en.wikipedia.org/wiki/Michael_J._McCulley
143	Shepherd, William M.	1984-05-23	1949-07-26	2002-01-15	Alive (1/31/17)	1988-12-02	1992-10-22	1984	34.8255	52.4736	43.2416	9.23203	8.41615	17.6482	13.1198	3.88775	4.52841	39.3539	0	M	0	1	0	1	0	0	0	0	1	1	http://www.jsc.nasa.gov/Bios/htmlbios/shepherd.html	https://en.wikipedia.org/wiki/William_Shepherd
144	Thornton, Kathryn C.	1984-05-23	1952-08-17	1996-08-01	Alive (1/31/17)	1989-11-22	1995-10-20	1984	31.7645	43.9562	43.1732	0.783025	11.4086	12.1916	6.69131	5.90828	5.50034	37.2649	0	F	1	1	0	0	0	0	0	0	0	1	http://www.jsc.nasa.gov/Bios/htmlbios/thornt-k.html	https://en.wikipedia.org/wiki/Kathryn_C._Thornton
145	Veach, Charles Lacy	1984-05-23	1944-09-18	Died Before Retirement	1995-10-03	1991-04-28	1992-10-22	1984	39.6769		48.0931		8.41615			1.48665	6.9295	46.6064	0	M	0	0	0	1	1	1	0	0	0	1	http://www.jsc.nasa.gov/Bios/htmlbios/veach.html
146	Wetherbee, James D.	1984-05-23	1952-11-27	2005-01-15	Alive (1/31/17)	1990-01-09	2002-11-23	1984	31.4853	52.1342	49.9877	2.14648	18.5024	20.6489	15.0171	12.8706	5.63176	37.117	0	M	0	0	0	1	0	1	0	1	0	0	http://www.jsc.nasa.gov/Bios/htmlbios/wetherbe.html	http://www.spacefacts.de/bios/astronauts/english/wetherbee_james.htm
147	Apt, Jerome	1985-06-04	1949-04-28	1997-05-15	Alive (1/31/17)	1991-04-05	1996-09-16	1985	36.1013	48.0465	47.3867	0.659822	11.2854	11.9452	6.11088	5.45106	5.83436	41.9357	0	M	1	0	0	0	1	0	0	0	0	1	http://www.jsc.nasa.gov/Bios/htmlbios/apt.html	https://en.wikipedia.org/wiki/Jerome_Apt
148	Baker, Michael A.	1985-06-04	1953-10-27	Not Applicable	Alive (1/31/17)	1991-08-02	1997-01-12	1985	31.603		43.2115		11.6085			5.44832	6.16016	37.7632	0	M	0	0	0	1	0	1	1	1	0	0	http://www.jsc.nasa.gov/Bios/htmlbios/baker-m.html	https://en.wikipedia.org/wiki/STS-43
149	Cabana, Robert D.	1985-06-04	1949-01-23	Current NASA	Alive (1/31/17)	1990-10-06	1998-12-04	1985	36.3614		49.8617		13.5003			8.16153	5.33881	41.7002	0	M	0	0	0	1	0	1	1	1	0	0	http://www.jsc.nasa.gov/Bios/htmlbios/cabana.html	https://en.wikipedia.org/wiki/Robert_D._Cabana
150	Duffy, Brian	1985-06-04	1953-06-20	2001-06-13	Alive (1/31/17)	1992-03-24	2000-10-11	1985	31.9562	47.9808	47.3101	0.670773	15.3539	16.0246	9.22108	8.55031	6.80356	38.7598	0	M	0	1	0	1	0	1	0	1	0	0	http://www.jsc.nasa.gov/Bios/htmlbios/duffy.html	https://en.wikipedia.org/wiki/Brian_Duffy_(astronaut)	https://www.nasa.gov/centers/johnson/news/releases/1999_2001/j01-61.html
151	Gemar, Charles D.	1985-06-04	1955-08-04	1996-07-02	Alive (1/31/17)	1990-11-15	1994-03-04	1985	29.8344	40.9117	38.5818	2.32991	8.74743	11.0773	5.62902	3.29911	5.44832	35.2827	0	M	0	0	0	1	0	0	0	0	0	1	http://www.jsc.nasa.gov/Bios/htmlbios/gemar.html	https://en.wikipedia.org/wiki/Charles_D._Gemar
152	Godwin, Linda M.	1985-06-04	1952-07-02	2010-08-15	Alive (1/31/17)	1991-04-05	2001-12-05	1985	32.9227	58.1191	49.4264	8.69268	16.5038	25.1964	19.3621	10.6694	5.83436	38.757	0	F	1	1	0	0	1	0	0	0	0	1	http://www.jsc.nasa.gov/Bios/htmlbios/godwin.html	https://en.wikipedia.org/wiki/Linda_M._Godwin
153	Henricks, Terence T.	1985-06-04	1952-07-05	1997-11-15	Alive (1/31/17)	1991-11-24	1996-06-20	1985	32.9144	45.3634	43.9589	1.40452	11.0445	12.449	5.97673	4.57221	6.47228	39.3867	0	M	0	1	0	1	0	1	0	1	0	0	http://www.jsc.nasa.gov/Bios/htmlbios/henricks.html	https://en.wikipedia.org/wiki/Terence_T._Henricks
154	Hieb, Richard J.	1985-06-04	1955-09-21	1995-03-04	Alive (1/31/17)	1991-04-28	1994-07-08	1985	29.7029	39.4497	38.7953	0.654346	9.0924	9.74675	3.84942	3.19507	5.89733	35.6003	0	M	0	1	0	0	1	0	0	0	0	1	http://www.jsc.nasa.gov/Bios/htmlbios/hieb.html	http://www.spacefacts.de/bios/astronauts/english/hieb_richard.htm
155	Jernigan, Tamara E.	1985-06-04	1959-05-07	2001-09-21	Alive (1/31/17)	1991-06-05	1999-05-27	1985	26.078	42.3765	40.0548	2.3217	13.9767	16.2984	10.2971	7.97536	6.00137	32.0794	0	F	1	1	0	0	1	0	0	0	0	1	http://www.jsc.nasa.gov/Bios/htmlbios/jernigan.html	http://www.spacefacts.de/bios/astronauts/english/jernigan_tamara.htm
156	Meade, Carl J.	1985-06-04	1950-11-16	1996-03-15	Alive (1/31/17)	1990-11-15	1994-09-09	1985	34.5489	45.3279	43.8138	1.51403	9.26489	10.7789	5.3306	3.81656	5.44832	39.9973	0	M	0	1	0	1	0	0	0	0	0	1	http://www.jsc.nasa.gov/Bios/htmlbios/meade.html	http://www.spacefacts.de/bios/astronauts/english/meade_carl.htm
157	Oswald, Stephen S.	1985-06-04	1951-06-30	2000-01-15	Alive (1/31/17)	1992-01-22	1995-03-02	1985	33.9302	48.5448	43.6715	4.87337	9.74127	14.6146	7.98084	3.10746	6.63381	40.564	0	M	0	0	0	1	0	1	0	1	0	0	http://www.jsc.nasa.gov/Bios/htmlbios/oswald.html	https://en.wikipedia.org/wiki/STS-42
158	Thorne, Stephen D.	1985-06-04	1953-02-11	Died Before Retirement	1986-05-24	Never Flew	Never Flew	1985	32.3094										0	M	0	0	0	1	0	1	0	0	0	0	http://www.jsc.nasa.gov/Bios/htmlbios/thorne.html
159	Thuot, Pierre J.	1985-06-04	1955-05-19	1995-06-15	Alive (1/31/17)	1990-02-28	1994-03-04	1985	30.0452	40.0739	38.7926	1.28131	8.74743	10.0287	5.29227	4.01095	4.73648	34.7817	0	M	0	1	0	1	0	0	0	0	0	1	http://www.jsc.nasa.gov/Bios/htmlbios/thuot.html	https://en.wikipedia.org/wiki/Pierre_J._Thuot
160	McAuliffe, S. Christa	1985-07-19	1948-09-02	Not Applicable	1986-01-28	1986-01-28	1986-01-28	1985	36.8761		37.4045		0.528405			0	0.528405	37.4045	0	F	0	1	0	0	0	0	0	0	1	0
161	Runco, Mario, Jr.	1987-05-06	1952-01-26	2002-06-27	Alive (1/31/17)	1991-11-24	1996-05-19	1987	35.2745	50.4175	44.3121	6.10541	9.03765	15.1431	10.59	4.4846	4.55305	39.8275	0	M	0	1	0	1	0	0	1	0	0	1	http://www.jsc.nasa.gov/Bios/htmlbios/runco.html	http://www.spacefacts.de/bios/astronauts/english/runco_mario.htm
162	Akers, Thomas D.	1987-06-05	1951-05-20	1997-08-15	Alive (1/31/17)	1990-10-06	1996-09-16	1987	36.0438	46.2396	45.3279	0.911704	9.28405	10.1958	6.85832	5.94661	3.33744	39.3812	0	M	0	1	0	0	0	0	0	0	0	1	http://www.jsc.nasa.gov/Bios/htmlbios/akers.html	http://www.spacefacts.de/bios/astronauts/english/akers_thomas.htm
163	Allen, Andrew M.	1987-06-05	1955-08-04	1997-10-15	Alive (1/31/17)	1992-07-31	1996-02-22	1987	31.8357	42.1985	40.553	1.64545	8.71732	10.3628	5.20739	3.56194	5.15537	36.9911	0	M	0	1	0	1	0	1	0	1	0	0	http://www.jsc.nasa.gov/Bios/htmlbios/allen-a.html	http://en.wikipedia.org/wiki/Andrew_M._Allen
164	Bowersox, Kenneth D.	1987-06-05	1956-11-14	2006-12-15	Alive (1/31/17)	1992-06-25	2002-11-23	1987	30.5544	50.0835	46.0233	4.06023	15.4689	19.5291	14.4723	10.412	5.05681	35.6112	0	M	0	1	0	1	0	1	0	1	0	1	http://www.jsc.nasa.gov/Bios/htmlbios/bowersox.html	https://en.wikipedia.org/wiki/Ken_Bowersox
165	Brown, Curtis L., Jr.	1987-06-05	1956-03-11	1999-12-31	Alive (1/31/17)	1992-09-12	1999-12-19	1987	31.2334	43.8056	43.7728	0.0328542	12.5394	12.5722	7.29911	7.26626	5.2731	36.5065	0	M	0	0	0	1	0	1	0	1	0	0	http://www.jsc.nasa.gov/Bios/htmlbios/brown-c.html	http://www.spacefacts.de/bios/astronauts/english/brown_curtis.htm
166	Chilton, Kevin P.	1987-06-05	1954-11-03	2008-08-15	Alive (1/31/17)	1992-05-07	1996-03-22	1987	32.5859	53.7823	41.3826	12.3997	8.79671	21.1964	16.2738	3.87406	4.92266	37.5086	0	M	0	1	0	1	0	1	0	1	0	0	http://www.jsc.nasa.gov/Bios/htmlbios/chilton.html	http://www.spacefacts.de/bios/astronauts/english/chilton_kevin.htm
167	Davis, N. Jan	1987-06-05	1953-11-01	2005-10-15	Alive (1/31/17)	1992-09-12	1997-08-07	1987	33.5907	51.9535	43.7645	8.18891	10.1739	18.3628	13.0897	4.90075	5.2731	38.8638	0	F	1	1	0	0	1	0	0	0	0	1	http://www.jsc.nasa.gov/Bios/htmlbios/davis.html	https://en.wikipedia.org/wiki/Jan_Davis
168	Foale, C. Michael	1987-06-05	1957-01-06	2013-08-15	Alive (1/31/17)	1992-03-24	1999-12-19	1987	30.4093	56.6051	42.9487	13.6564	12.5394	26.1958	21.3936	7.73717	4.80219	35.2115	0	M	1	0	0	0	1	0	0	0	1	1	http://www.jsc.nasa.gov/Bios/htmlbios/foale.html	https://en.wikipedia.org/wiki/Michael_Foale
169	Harbaugh, Gregory J.	1987-06-05	1956-04-15	2001-03-15	Alive (1/31/17)	1991-04-28	1997-02-11	1987	31.1376	44.9144	40.8268	4.08761	9.68925	13.7769	9.8809	5.79329	3.89596	35.0335	0	M	0	1	0	0	1	0	0	0	0	1	http://www.jsc.nasa.gov/Bios/htmlbios/harbaugh.html	https://en.wikipedia.org/wiki/Gregory_J._Harbaugh
170	Jemison, Mae C.	1987-06-05	1956-10-17	1993-03-15	Alive (1/31/17)	1992-09-12	1992-09-12	1987	30.6311	36.4079	35.9042	0.503765	5.2731	5.77687	0.503765	0	5.2731	35.9042	0	F	0	0	1	0	0	0	0	0	0	1	http://www.jsc.nasa.gov/Bios/htmlbios/jemison-mc.html	https://en.wikipedia.org/wiki/Mae_Jemison
171	McMonagle, Donald R.	1987-06-05	1952-05-14	1997-07-15	Alive (1/31/17)	1991-04-28	1994-11-03	1987	35.0582	45.1691	42.4723	2.69678	7.4141	10.1109	6.21492	3.51814	3.89596	38.9541	0	M	0	1	0	1	1	1	0	1	0	1	http://www.jsc.nasa.gov/Bios/htmlbios/mcmonagl.html	http://www.astronautix.com/astros/mcmnagle.htm	http://spaceflightnow.com/news/0001/13mcmonagleleaves/
172	Melnick, Bruce E.	1987-06-05	1949-12-05	1992-07-15	Alive (1/31/17)	1990-10-06	1992-05-07	1987	37.4976	42.6092	42.4203	0.188912	4.92266	5.11157	1.77413	1.58522	3.33744	40.835	0	M	0	1	0	1	0	0	0	0	0	1	http://www.jsc.nasa.gov/Bios/htmlbios/melnick-be.html	https://en.wikipedia.org/wiki/Bruce_E._Melnick
173	Readdy, William F.	1987-06-05	1952-01-24	2005-10-14	Alive (1/31/17)	1992-01-22	1996-09-16	1987	35.3621	53.7221	44.6461	9.07598	9.28405	18.36	13.7276	4.65161	4.63244	39.9945	0	M	0	0	0	1	1	1	0	1	0	1	http://www.jsc.nasa.gov/Bios/htmlbios/readdy.html	http://www.spacefacts.de/bios/astronauts/english/readdy_william.htm
174	Reightler, Kenneth S., Jr.	1987-06-05	1951-03-24	1995-07-15	Alive (1/31/17)	1991-09-12	1994-02-03	1987	36.1999	44.3094	42.8665	1.44285	6.66667	8.10951	3.83847	2.39562	4.27105	40.4709	0	M	0	1	0	1	0	1	0	1	0	0	http://www.jsc.nasa.gov/Bios/htmlbios/reightle.html	http://www.spacefacts.de/bios/astronauts/english/reightler_kenneth.htm
175	Voss, James S.	1987-06-05	1949-03-03	2003-06-15	Alive (1/31/17)	1991-11-24	2001-03-08	1987	38.256	54.2834	52.0137	2.26968	13.7577	16.0274	11.5565	9.28679	4.47091	42.7269	0	M	0	1	0	1	1	0	0	0	0	1	http://www.jsc.nasa.gov/Bios/htmlbios/voss-ji.html	http://www.spacefacts.de/bios/astronauts/english/voss_james.htm
176	Bursch, Daniel W.	1990-01-17	1957-07-25	2005-05-15	Alive (1/31/17)	1993-09-12	2001-12-05	1990	32.4819	47.8056	44.3641	3.44148	11.8823	15.3238	11.6715	8.22998	3.65229	36.1342	0	M	0	1	0	1	0	0	0	0	1	1	http://en.wikipedia.org/wiki/Daniel_W._Bursch
177	Chiao, Leroy	1990-01-17	1960-08-28	2005-12-05	Alive (1/31/17)	1994-07-08	2004-10-09	1990	29.3881	45.2704	44.115	1.15537	14.7269	15.8823	11.4114	10.256	4.47091	33.859	0	M	1	1	0	0	0	0	0	0	0	1	http://en.wikipedia.org/wiki/Leroy_Chiao
178	Clifford, Michael R.	1990-01-17	1952-10-13	1997-01-06	Alive (1/31/17)	1992-12-02	1996-03-22	1990	37.2621	44.2327	43.4387	0.793977	6.17659	6.97057	4.09582	3.30185	2.87474	40.1369	0	M	0	1	0	1	1	0	0	0	0	1	http://en.wikipedia.org/wiki/Michael_R._Clifford	https://en.wikipedia.org/wiki/STS-53	http://www.spacefacts.de/bios/astronauts/english/clifford_michael.htm
179	Cockrell, Kenneth D.	1990-01-17	1950-04-09	2006-02-15	Alive (1/31/17)	1993-04-08	2002-06-05	1990	39.7755	55.8549	52.1561	3.69884	12.3806	16.0794	12.8569	9.15811	3.22245	42.9979	0	M	0	1	0	1	1	1	1	1	0	1	http://www.jsc.nasa.gov/Bios/htmlbios/cockrell.html	http://www.spacefacts.de/bios/astronauts/english/cockrell_kenneth.htm
180	Collins, Eileen M.	1990-01-17	1956-11-19	2006-05-01	Alive (1/31/17)	1995-02-03	2005-07-26	1990	33.1608	49.4456	48.6817	0.76386	15.5209	16.2847	11.2389	10.475	5.04586	38.2067	0	F	0	1	0	1	0	1	0	1	0	0	http://www.jsc.nasa.gov/Bios/htmlbios/collins.html	https://en.wikipedia.org/wiki/Eileen_Collins
181	Gregory, William G.	1990-01-17	1957-05-14	1999-07-01	Alive (1/31/17)	1995-03-02	1995-03-02	1990	32.679	42.13	37.7988	4.33128	5.11978	9.45106	4.33128	0	5.11978	37.7988	0	M	0	1	0	1	0	1	0	1	0	0	http://www.jsc.nasa.gov/Bios/htmlbios/gregor-w.html
182	Halsell, James D., Jr.	1990-01-17	1956-09-29	2006-11-15	Alive (1/31/17)	1994-07-08	2000-05-19	1990	33.3005	50.1273	43.6359	6.49144	10.3354	16.8268	12.3559	5.86448	4.47091	37.7714	0	M	0	1	0	1	0	1	0	1	0	0	http://www.jsc.nasa.gov/Bios/htmlbios/halsell.html
183	Harris, Bernard A., Jr.	1990-01-17	1956-06-26	1996-04-15	Alive (1/31/17)	1993-04-26	1995-02-02	1990	33.5606	39.8029	38.6037	1.19918	5.04312	6.2423	2.97057	1.77139	3.27173	36.8323	0	M	0	1	1	0	1	0	0	0	0	1	http://www.jsc.nasa.gov/Bios/htmlbios/harris.html
184	Helms, Susan J.	1990-01-17	1958-02-26	2002-07-15	Alive (1/31/17)	1993-01-13	2001-03-08	1990	31.8905	44.3806	43.0281	1.3525	11.1376	12.4901	9.50034	8.14784	2.98973	34.8802	0	F	0	1	0	1	0	0	0	0	1	1	http://www.jsc.nasa.gov/Bios/htmlbios/helms.html	https://en.wikipedia.org/wiki/Susan_Helms
185	Jones, Thomas D.	1990-01-17	1955-01-22	2001-07-01	Alive (1/31/17)	1994-04-09	2001-02-07	1990	34.987	46.4394	46.0452	0.394251	11.0582	11.4524	7.22793	6.83368	4.2245	39.2115	0	M	1	0	0	1	1	0	0	0	0	1	http://www.jsc.nasa.gov/Bios/htmlbios/jones.html	https://en.wikipedia.org/wiki/Thomas_David_Jones	https://en.wikipedia.org/wiki/Space_Shuttle_Endeavour
186	McArthur, William S.	1990-01-17	1951-07-26	Current NASA	Alive (1/31/17)	1993-10-18	2005-09-30	1990	38.4805		54.1821		15.7016			11.9507	3.75086	42.2313	0	M	0	1	0	1	1	0	1	0	0	1	http://www.jsc.nasa.gov/Bios/htmlbios/mcarthur.html
187	Newman, James H.	1990-01-17	1956-10-16	2008-07-15	Alive (1/31/17)	1993-09-12	2002-03-01	1990	33.2539	51.7454	45.3717	6.37372	12.1177	18.4914	14.8392	8.46543	3.65229	36.9062	0	M	1	1	0	0	1	0	0	0	0	1	http://www.jsc.nasa.gov/Bios/htmlbios/newman.html
188	Ochoa, Ellen	1990-01-17	1958-05-10	Current NASA	Alive (1/31/17)	1993-04-08	2002-04-08	1990	31.6906		43.9124		12.2218			8.99932	3.22245	34.9131	0	F	1	1	0	0	1	0	1	0	0	1	http://www.jsc.nasa.gov/Bios/htmlbios/ochoa.html	https://en.wikipedia.org/wiki/Ellen_Ochoa
189	Precourt, Charles J.	1990-01-17	1955-06-29	2005-03-15	Alive (1/31/17)	1993-04-26	1998-06-02	1990	34.5544	49.7112	42.9268	6.78439	8.37235	15.1567	11.885	5.10062	3.27173	37.8261	0	M	0	1	0	1	0	1	0	1	0	1	http://www.jsc.nasa.gov/Bios/htmlbios/precourt.html	https://en.wikipedia.org/wiki/Charles_J._Precourt	https://www.nasa.gov/mission_pages/shuttle/shuttlemissions/archives/sts-71.html
190	Searfoss, Richard A.	1990-01-17	1956-06-05	1998-12-31	Alive (1/31/17)	1993-10-18	1998-04-17	1990	33.6181	42.5708	41.8645	0.706366	8.24641	8.95277	5.20192	4.49555	3.75086	37.3689	0	M	0	1	0	1	0	1	0	1	0	0	http://www.jsc.nasa.gov/Bios/htmlbios/searfoss.html	https://en.wikipedia.org/wiki/Richard_A._Searfoss	http://bit.ly/2gkzyPF
191	Sega, Ronald M.	1990-01-17	1952-12-04	1996-07-01	Alive (1/31/17)	1994-02-03	1996-03-22	1990	37.1198	43.5729	43.2964	0.276523	6.17659	6.45311	2.40657	2.13005	4.04654	41.1663	0	M	1	1	0	1	0	0	0	0	0	1	http://www.jsc.nasa.gov/Bios/htmlbios/sega.html
192	Sherlock, Nancy J.	1990-01-17	1958-12-29	Current NASA	Alive (1/31/17)	1993-06-21	2002-03-01	1990	31.0527		43.1704		12.1177			8.69268	3.42505	34.4778	0	F	1	1	0	1	1	0	1	0	0	1	http://www.jsc.nasa.gov/Bios/htmlbios/currie.html
193	Thomas, Donald A.	1990-01-17	1955-05-06	2007-07-15	Alive (1/31/17)	1994-07-08	1997-07-01	1990	34.7023	52.1916	42.1547	10.037	7.45243	17.4894	13.0185	2.98152	4.47091	39.1732	0	M	1	1	0	0	1	0	0	0	0	1	http://www.jsc.nasa.gov/Bios/htmlbios/thomas-d.html
194	Voss, Janice E.	1990-01-17	1956-10-08	Died Before Retirement	2012-02-06	1993-06-21	2000-02-11	1990	33.2758		43.3429		10.0671			6.64203	3.42505	36.7009	0	F	1	1	0	0	1	0	0	0	1	1	http://www.jsc.nasa.gov/Bios/htmlbios/voss-jan.html	https://en.wikipedia.org/wiki/Janice_E._Voss
195	Walz, Carl E.	1990-01-17	1955-09-06	2008-12-05	Alive (1/31/17)	1993-09-12	2001-12-05	1990	34.3655	53.2485	46.2478	7.00068	11.8823	18.883	15.2307	8.22998	3.65229	38.0178	0	M	0	1	0	1	0	0	0	0	1	1	http://www.jsc.nasa.gov/Bios/htmlbios/walz.html
196	Wilcutt, Terrence W.	1990-01-17	1949-10-31	Current NASA	Alive (1/31/17)	1994-09-30	2000-09-08	1990	40.2136		50.8556		10.642			5.94114	4.70089	44.9144	0	M	0	0	0	1	0	0	1	1	0	0	http://www.jsc.nasa.gov/Bios/htmlbios/wilcutt.html	https://www.nasa.gov/about/highlights/wilcutt_bio.html
197	Wisoff, Peter J. K.	1990-01-17	1958-08-16	2001-09-15	Alive (1/31/17)	1993-06-21	2000-10-11	1990	31.4223	43.0828	42.1547	0.928131	10.7324	11.6605	8.23546	7.30732	3.42505	34.8474	0	M	1	1	0	0	0	0	0	0	0	1	http://www.jsc.nasa.gov/Bios/htmlbios/wisoff.html
198	Wolf, David A.	1990-01-17	1956-08-23	2012-12-15	Alive (1/31/17)	1993-10-16	2009-07-15	1990	33.4018	56.3121	52.8925	3.41958	19.4908	22.9103	19.165	15.7454	3.74538	37.1472	0	M	0	0	1	1	1	0	0	0	1	1	http://www.jsc.nasa.gov/Bios/htmlbios/wolf.html	https://en.wikipedia.org/wiki/David_Wolf_(astronaut)
199	Barry, Daniel T.	1992-03-31	1953-12-30	2005-04-15	Alive (1/31/17)	1996-01-11	2001-08-10	1992	38.2505	51.2909	47.6112	3.67967	9.36071	13.0404	9.25941	5.57974	3.78097	42.0315	0	M	1	1	1	0	0	0	0	0	0	1	http://www.jsc.nasa.gov/Bios/htmlbios/barry.html
200	Brady, Charles E., Jr.	1992-03-31	1951-08-12	2002-08-15	2006-07-23	1996-06-20	1996-06-20	1992	40.6352	51.0089	44.8569	6.15195	4.22177	10.3737	6.15195	0	4.22177	44.8569	0	M	0	0	1	1	0	0	0	0	0	1	http://www.jsc.nasa.gov/Bios/htmlbios/brady.html	http://www.space.com/2680-sts-78-astronaut-charles-brady-54-dies.html
201	Coleman, Catherine	1992-03-31	1960-12-14	Not Applicable	Alive (1/31/17)	1995-10-20	2011-03-16	1992	31.2936		50.2505		18.9569			15.4031	3.55373	34.8474	0	F	1	0	0	1	0	0	0	0	0	1	www.jsc.nasa.gov/Bios/htmlbios/coleman.pdf	https://en.wikipedia.org/wiki/Expedition_27
202	Gernhardt, Michael L.	1992-03-31	1956-05-04	Not Applicable	Alive (1/31/17)	1995-09-07	2001-07-12	1992	35.9069		45.1882		9.28131			5.84531	3.436	39.3429	0	M	1	1	0	0	0	0	1	0	0	1	www.jsc.nasa.gov/Bios/htmlbios/gernhard.html	https://en.wikipedia.org/wiki/Michael_L._Gernhardt
203	Grunsfeld, John M.	1992-03-31	1958-10-10	2016-04-15	Alive (1/31/17)	1995-03-02	2009-05-11	1992	33.473	57.514	50.5845	6.9295	17.1116	24.0411	21.1225	14.193	2.91855	36.3915	0	M	1	1	0	0	1	0	1	0	0	1	www.jsc.nasa.gov/Bios/htmlbios/grunsfel.html	https://en.wikipedia.org/wiki/John_M._Grunsfeld
204	Horowitz, Scott J.	1992-03-31	1957-03-24	2007-10-01	Alive (1/31/17)	1996-02-22	2001-08-10	1992	35.0198	50.5216	44.3806	6.141	9.36071	15.5017	11.6057	5.46475	3.89596	38.9158	0	M	1	1	0	1	0	1	0	1	0	0	www.jsc.nasa.gov/Bios/htmlbios/horowitz.html	https://en.wikipedia.org/wiki/Scott_J._Horowitz
205	Jett, Brent W., Jr.	1992-03-31	1958-10-05	2013-01-15	Alive (1/31/17)	1996-01-11	2006-09-06	1992	33.4867	54.2806	47.9206	6.36003	14.4339	20.794	17.013	10.653	3.78097	37.2676	0	M	0	1	0	1	0	1	0	1	0	0	www.jsc.nasa.gov/Bios/htmlbios/jett.html	https://en.wikipedia.org/wiki/Brent_W._Jett_Jr.
206	Kregel, Kevin R.	1992-03-31	1956-09-16	2003-12-15	Alive (1/31/17)	1995-07-13	2000-02-11	1992	35.5373	47.2444	43.4031	3.8412	7.86585	11.707	8.42437	4.58316	3.28268	38.82	0	M	0	1	0	1	1	1	0	1	0	0	www.jsc.nasa.gov/Bios/htmlbios/kregel.html
207	Lawrence, Wendy B.	1992-03-31	1959-07-02	2006-06-15	Alive (1/31/17)	1995-03-02	2005-07-26	1992	32.7474	46.9541	46.0671	0.887064	13.3196	14.2067	11.2882	10.4011	2.91855	35.666	0	F	0	1	0	1	0	0	0	0	0	1	www.jsc.nasa.gov/Bios/htmlbios/lawrence.html
208	Linenger, Jerry M.	1992-03-31	1955-01-16	1998-01-15	Alive (1/31/17)	1994-09-09	1997-01-12	1992	37.2047	42.9979	41.9904	1.00753	4.78576	5.79329	3.35113	2.3436	2.44216	39.6468	0	M	1	1	1	1	0	0	0	0	1	1	www.jsc.nasa.gov/Bios/htmlbios/linenger.html
209	Linnehan, Richard M.	1992-03-31	1957-09-19	Current NASA	Alive (1/31/17)	1996-06-20	2008-03-11	1992	34.5298		50.475		15.9452			11.7235	4.22177	38.7515	0	M	1	1	0	1	0	0	1	0	0	1	www.jsc.nasa.gov/Bios/htmlbios/linnehan.html
210	Lopez-Alegria, Michael E.	1992-03-31	1958-05-30	2012-03-12	Alive (1/31/17)	1995-10-20	2006-09-18	1992	33.8371	53.7851	48.3039	5.48118	14.4668	19.948	16.3943	10.9131	3.55373	37.3908	0	M	0	1	0	1	0	0	0	0	0	1	www.jsc.nasa.gov/Bios/htmlbios/lopez-al.html	https://en.wikipedia.org/wiki/Michael_L%C3%B3pez-Alegr%C3%ADa
211	Parazynski, Scott E.	1992-03-31	1961-07-28	2009-03-15	Alive (1/31/17)	1994-11-03	2007-10-23	1992	30.6749	47.6304	46.2368	1.39357	15.5619	16.9555	14.3628	12.9692	2.59274	33.2676	0	M	0	0	1	0	1	0	0	0	0	1	www.jsc.nasa.gov/Bios/htmlbios/parazyns.html
212	Rominger, Kent V.	1992-03-31	1956-08-07	2006-09-15	Alive (1/31/17)	1995-10-20	2001-04-19	1992	35.6468	50.1054	44.6982	5.40726	9.05133	14.4586	10.9049	5.4976	3.55373	39.2005	0	M	0	1	0	1	0	1	0	1	0	0	www.jsc.nasa.gov/Bios/htmlbios/rominger.html		http://www.spacefacts.de/bios/astronauts/english/rominger_kent.htm
213	Scott, Winston E.	1992-03-31	1950-08-06	1999-07-31	Alive (1/31/17)	1996-01-11	1997-11-19	1992	41.6509	48.9829	47.2882	1.69473	5.63723	7.33196	3.55099	1.85626	3.78097	45.4319	0	M	0	1	0	1	0	0	0	0	0	0	www.jsc.nasa.gov/Bios/htmlbios/scott.html
214	Smith, Steven L.	1992-03-31	1958-12-30	Current NASA	Alive (1/31/17)	1994-09-30	2002-04-08	1992	33.2512		43.2717		10.0205			7.52088	2.49966	35.7509	0	M	0	1	0	0	1	0	1	0	0	1	www.jsc.nasa.gov/Bios/htmlbios/smith-s.html	https://en.wikipedia.org/wiki/STS-68	https://en.wikipedia.org/wiki/STS-110
215	Tanner, Joseph R.	1992-03-31	1950-01-21	2008-08-15	Alive (1/31/17)	1994-11-03	2006-09-09	1992	42.1903	58.5654	56.6324	1.93292	14.4422	16.3751	13.7823	11.8494	2.59274	44.783	0	M	0	0	0	1	1	0	0	0	0	1	www.jsc.nasa.gov/Bios/htmlbios/tanner.html	https://en.wikipedia.org/wiki/Joseph_R._Tanner
216	Thomas, Andrew S. W.	1992-03-31	1951-12-18	2014-02-15	Alive (1/31/17)	1996-05-19	2005-07-26	1992	40.2847	62.1629	53.6044	8.55852	13.3196	21.8782	17.744	9.18549	4.13415	44.4189	0	M	1	0	0	0	1	0	0	0	1	1	www.jsc.nasa.gov/Bios/htmlbios/thomas-a.html
217	Weber, Mary E.	1992-03-31	1962-08-24	2002-12-15	Alive (1/31/17)	1995-07-13	2000-05-19	1992	29.6016	40.3094	37.7358	2.57358	8.13415	10.7077	7.42505	4.85147	3.28268	32.8843	0	F	1	1	0	0	0	0	0	0	0	1	www.jsc.nasa.gov/Bios/htmlbios/weber.html	http://bit.ly/2f7dVVi
218	Altman, Scott D.	1994-12-12	1959-08-15	2010-09-15	Alive (1/31/17)	1998-04-17	2009-05-11	1994	35.3265	51.0856	49.7385	1.34702	14.412	15.7591	12.4134	11.0664	3.34565	38.6721	0	M	0	1	0	1	0	1	0	1	0	0	www.jsc.nasa.gov/Bios/htmlbios/altman.html
219	Anderson, Michael P.	1994-12-12	1959-12-25	Died Before Retirement	2003-02-01	1998-01-22	2003-01-16	1994	34.9651		43.0609		8.09582			4.98289	3.11294	38.078	0	M	0	1	0	1	0	0	0	0	0	1	www.jsc.nasa.gov/Bios/htmlbios/anderson.html
220	Ashby, Jeffrey S.	1994-12-12	1954-06-16	2008-06-15	Alive (1/31/17)	1999-07-23	2002-10-07	1994	40.4901	53.9986	48.3094	5.68925	7.8193	13.5086	8.89802	3.20876	4.61054	45.1006	0	M	0	1	0	1	0	1	0	1	0	0	www.jsc.nasa.gov/Bios/htmlbios/ashby.html	https://en.wikipedia.org/wiki/Jeffrey_Ashby	https://en.wikipedia.org/wiki/STS-93
221	Bloomfield, Michael J.	1994-12-12	1959-03-16	2007-08-15	Alive (1/31/17)	1997-09-25	2002-04-08	1994	35.7426	48.4162	43.0637	5.3525	7.32101	12.6735	9.88638	4.53388	2.78713	38.5298	0	M	0	1	0	1	0	1	0	1	0	0	www.jsc.nasa.gov/Bios/htmlbios/bloomfie.html
222	Chawla, Kalpana	1994-12-12	1962-03-17	Died Before Retirement	2003-02-01	1997-11-19	2003-01-16	1994	32.7392		40.835		8.09582			5.15811	2.93771	35.6769	0	F	1	1	0	0	1	0	0	0	0	1	www.jsc.nasa.gov/Bios/htmlbios/chawla.html	https://en.wikipedia.org/wiki/Kalpana_Chawla
223	Curbeam, Robert L., Jr.	1994-12-12	1962-03-05	2007-11-15	Alive (1/31/17)	1997-08-07	2006-12-09	1994	32.7721	45.6975	44.7639	0.933607	11.9918	12.9254	10.2724	9.33881	2.65298	35.4251	0	M	0	1	0	1	0	0	0	0	0	1	www.jsc.nasa.gov/Bios/htmlbios/curbeam.html	https://en.wikipedia.org/wiki/Robert_Curbeam
224	Edwards, Joe F., Jr.	1994-12-12	1958-02-03	2000-04-30	Alive (1/31/17)	1998-01-22	1998-01-22	1994	36.8542	42.2368	39.9671	2.26968	3.11294	5.38261	2.26968	0	3.11294	39.9671	0	M	0	1	0	1	0	0	0	1	0	0	www.jsc.nasa.gov/Bios/htmlbios/edwards.html
225	Gorie, Dominic L. P.	1994-12-12	1957-05-02	2010-06-04	Alive (1/31/17)	1998-06-02	2008-03-11	1994	37.6126	53.0897	50.8583	2.23135	13.2457	15.4771	12.0055	9.77413	3.47159	41.0842	0	M	0	1	0	1	0	1	0	1	0	0	www.jsc.nasa.gov/Bios/htmlbios/gorie.html
226	Hire, Kathryn P.	1994-12-12	1959-08-26	2010-03-15	Alive (1/31/17)	1998-04-17	2010-02-08	1994	35.2964	50.5517	50.4559	0.0958248	15.1595	15.2553	11.9097	11.8138	3.34565	38.642	0	F	0	1	0	1	1	0	1	0	0	1	www.jsc.nasa.gov/Bios/htmlbios/hire.html	https://en.wikipedia.org/wiki/Kathryn_P._Hire	http://www.astronautix.com/h/hire.html
227	Husband, Rick D.	1994-12-12	1957-07-12	Died Before Retirement	2003-02-01	1999-05-27	2003-01-16	1994	37.4182		45.514		8.09582			3.64134	4.45448	41.8727	0	M	0	1	0	1	0	1	0	1	0	0	www.jsc.nasa.gov/Bios/htmlbios/husband.html
228	Kavandi, Janet L.	1994-12-12	1959-07-17	Current NASA	Alive (1/31/17)	1998-06-02	2001-07-12	1994	35.4059		41.9877		6.58179			3.1102	3.47159	38.8775	0	F	1	1	0	0	0	0	1	0	0	1	www.jsc.nasa.gov/Bios/htmlbios/kavandi.pdf	https://en.wikipedia.org/wiki/Janet_L._Kavandi
229	Kilrain, Susan	1994-12-12	1961-10-24	2002-12-15	Alive (1/31/17)	1997-04-04	1997-07-01	1994	33.1335	41.1417	35.6851	5.45654	2.55168	8.00821	5.69747	0.240931	2.31075	35.4442	0	F	0	1	0	1	0	1	0	1	0	0	www.jsc.nasa.gov/Bios/htmlbios/kilrain.html
230	Lindsey, Steven W.	1994-12-12	1960-08-24	2011-07-15	Alive (1/31/17)	1997-11-19	2011-02-24	1994	34.2998	50.8884	50.5024	0.386037	16.2026	16.5886	13.6509	13.2649	2.93771	37.2375	0	M	0	1	0	1	0	1	0	1	0	0	www.jsc.nasa.gov/Bios/htmlbios/lindsey.html
231	Lu, Edward T.	1994-12-12	1963-07-01	2007-08-15	Alive (1/31/17)	1997-05-15	2003-04-25	1994	31.4497	44.1232	39.8166	4.30664	8.36687	12.6735	10.2505	5.94387	2.423	33.8727	0	M	1	0	0	0	0	0	0	0	0	1	www.jsc.nasa.gov/Bios/htmlbios/lu.html
232	Melroy, Pamela A.	1994-12-12	1961-09-17	2009-08-15	Alive (1/31/17)	2000-10-11	2007-10-23	1994	33.2348	47.9097	46.0972	1.81246	12.8624	14.6749	8.84326	7.0308	5.83162	39.0664	0	F	0	1	0	1	0	1	0	1	0	0	www.jsc.nasa.gov/Bios/htmlbios/melroy.html
233	Noriega, Carlos I.	1994-12-12	1959-10-08	Current NASA	Alive (1/31/17)	1997-05-15	2000-11-30	1994	35.1786		41.1472		5.96851			3.54552	2.423	37.6016	0	M	0	1	0	1	0	0	0	0	0	1	www.jsc.nasa.gov/Bios/htmlbios/noriega.html
234	Reilly, James F., II	1994-12-12	1954-03-18	2008-05-15	Alive (1/31/17)	1998-01-22	2007-06-08	1994	40.7365	54.1602	53.2238	0.936345	12.4873	13.4237	10.3107	9.3744	3.11294	43.8494	0	M	1	1	0	1	0	0	0	0	0	1	www.jsc.nasa.gov/Bios/htmlbios/reilly.html
235	Robinson, Stephen K.	1994-12-12	1955-10-26	2012-06-30	Alive (1/31/17)	1997-08-07	2010-02-08	1994	39.1294	56.679	54.2888	2.39014	15.1595	17.5496	14.8966	12.5065	2.65298	41.7823	0	M	1	1	0	0	1	0	0	0	0	1	www.jsc.nasa.gov/Bios/htmlbios/robinson.html
236	Sturckow, Frederick W. R.	1994-12-12	1961-08-11	2013-03-15	Alive (1/31/17)	1998-12-04	2009-08-28	1994	33.3361	51.5921	48.0465	3.54552	14.7105	18.256	14.2779	10.7324	3.9781	37.3142	0	M	0	1	0	1	0	1	0	1	0	0	www.jsc.nasa.gov/Bios/htmlbios/sturckow.html
237	Brown, David M.	1996-05-01	1956-04-16	Died Before Retirement	2003-02-01	2003-01-16	2003-01-16	1996	40.0411		46.7515		6.71047			0	6.71047	46.7515	0	M	0	0	1	1	0	0	0	0	0	1	www.jsc.nasa.gov/Bios/htmlbios/brown.html
238	Burbank, Daniel C.	1996-05-01	1961-07-27	Active	Alive (1/31/17)	2000-09-08	2011-11-14	1996	34.7625		50.2998		15.5373			11.1814	4.35592	39.1184	1	M	0	1	0	0	0	1	0	0	0	1	www.jsc.nasa.gov/Bios/htmlbios/burbank.html
239	Cagle, Yvonne D.	1996-05-01	1959-04-24	Current NASA	Alive (1/31/17)	Never Flew	Never Flew	1996	37.0212										0	F	0	1	1	1	1	0	1	0	0	0	www.jsc.nasa.gov/Bios/htmlbios/cagle.html	https://en.wikipedia.org/wiki/Yvonne_Cagle
240	Caldeiro, Fernando	1996-05-01	1958-06-12	Died Before Retirement	2009-10-03	Never Flew	Never Flew	1996	37.8864										0	M	0	1	0	0	1	0	0	0	0	0	www.jsc.nasa.gov/Bios/htmlbios/caldeiro.html
241	Camarda, Charles J.	1996-05-01	1952-05-08	2006-06-15	Alive (1/31/17)	2005-07-26	2005-07-26	1996	43.9808	54.1027	53.2156	0.887064	9.23477	10.1218	0.887064	0	9.23477	53.2156	0	M	1	1	0	0	0	0	1	0	0	1	www.jsc.nasa.gov/Bios/htmlbios/camarda.html	http://www.spacefacts.de/bios/astronauts/english/camarda_charles.htm
242	Carey, Duane G. D.	1996-05-01	1957-04-30	2004-10-15	Alive (1/31/17)	2002-03-01	2002-03-01	1996	39.0034	47.4606	44.835	2.6256	5.83162	8.45722	2.6256	0	5.83162	44.835	0	M	0	1	0	1	0	1	0	1	0	0	www.jsc.nasa.gov/Bios/htmlbios/carey.html	https://en.wikipedia.org/wiki/Duane_G._Carey
243	Clark, Laurel B. S.	1996-05-01	1961-03-10	Died Before Retirement	2003-02-01	2003-01-16	2003-01-16	1996	35.1431		41.8535		6.71047			0	6.71047	41.8535	0	F	0	0	1	0	0	0	0	0	0	1	www.jsc.nasa.gov/Bios/htmlbios/clark.html
244	Fincke, Edward M.	1996-05-01	1967-03-14	Active	Alive (1/31/17)	2004-04-18	2011-05-16	1996	29.1335		44.1725		15.039			7.07461	7.96441	37.0979	1	M	0	1	0	1	0	1	0	0	0	1	www.jsc.nasa.gov/Bios/htmlbios/fincke.pdf
245	Forrester, Patrick G.	1996-05-01	1957-03-31	2012-05-31	Alive (1/31/17)	2001-08-10	2009-08-28	1996	39.0856	55.1677	52.4107	2.75702	13.3251	16.0821	10.8063	8.04928	5.27584	44.3614	0	M	0	1	0	1	1	0	1	0	0	1	www.jsc.nasa.gov/Bios/htmlbios/forreste.pdf
246	Frick, Stephen N.	1996-05-01	1964-09-30	2015-07-13	Alive (1/31/17)	2002-04-08	2008-02-07	1996	31.5838	50.7817	43.3539	7.42779	11.77	19.1978	13.2621	5.83436	5.93566	37.5195	0	M	0	1	0	1	0	1	1	1	0	0	www.jsc.nasa.gov/Bios/htmlbios/frick.html	https://en.wikipedia.org/wiki/Stephen_Frick	https://www.nasa.gov/press-release/astronaut-stephen-frick-retires-from-nasa
247	Herrington, John B.	1996-05-01	1958-09-14	2005-09-09	Alive (1/31/17)	2002-11-23	2002-11-23	1996	37.629	46.987	44.1916	2.79535	6.56263	9.35797	2.79535	0	6.56263	44.1916	0	M	0	1	0	1	0	0	0	0	0	1	www.jsc.nasa.gov/Bios/htmlbios/herringt.html	http://www.spacefacts.de/bios/astronauts/english/herrington_john.htm
248	Higginbotham, Joan E.	1996-05-01	1964-08-03	2007-11-15	Alive (1/31/17)	2006-12-09	2006-12-09	1996	31.7426	43.2827	42.3491	0.933607	10.6064	11.54	0.933607	0	10.6064	42.3491	0	F	0	1	0	0	0	0	0	0	0	1	www.jsc.nasa.gov/Bios/htmlbios/higginbo.html	https://en.wikipedia.org/wiki/Joan_Higginbotham
249	Hobaugh, Charles O.	1996-05-01	1961-11-06	2011-09-23	Alive (1/31/17)	2001-07-12	2009-11-16	1996	34.4832	49.8782	48.0274	1.85079	13.5441	15.3949	10.1985	8.34771	5.19644	39.6797	0	M	0	0	0	1	0	1	0	1	0	0	www.jsc.nasa.gov/Bios/htmlbios/hobaugh.html	http://www.spacefacts.de/bios/astronauts/english/hobaugh_charles.htm
250	Kelly, James M.	1996-05-01	1964-05-14	2010-12-15	Alive (1/31/17)	2001-03-08	2005-07-26	1996	31.9644	46.5873	41.1992	5.38809	9.23477	14.6229	9.77139	4.3833	4.85147	36.8159	0	M	0	1	0	1	0	1	1	1	0	0	www.jsc.nasa.gov/Bios/htmlbios/kellyjm.html	http://www.spacefacts.de/bios/astronauts/english/kelly_james.htm
251	Kelly, Mark E.	1996-05-01	1964-02-21	2011-10-01	Alive (1/31/17)	2001-12-05	2011-05-16	1996	32.1916	47.6085	47.2307	0.377823	15.039	15.4168	9.82067	9.44285	5.59617	37.7878	0	M	0	1	0	1	0	1	0	1	0	0	www.jsc.nasa.gov/Bios/htmlbios/kellyme.html	https://en.wikipedia.org/wiki/Mark_Kelly
252	Kelly, Scott J.	1996-05-01	1964-02-21	2016-03-15	Alive (1/31/17)	1999-12-19	2015-03-27	1996	32.1916	52.063	51.0938	0.969199	18.9021	19.8713	16.2382	15.269	3.63313	35.8248	0	M	0	1	0	1	0	1	0	1	0	0	www.jsc.nasa.gov/Bios/htmlbios/kellysj.pdf	https://www.nasa.gov/press-release/astronaut-scott-kelly-to-retire-from-nasa-in-april
253	Lockhart, Paul S.	1996-05-01	1956-04-28	2005-01-01	Alive (1/31/17)	2002-06-05	2002-11-23	1996	40.0082	48.679	46.5708	2.10815	6.56263	8.67077	2.57632	0.468172	6.09446	46.1027	0	M	0	1	0	1	0	1	0	1	0	0	www.jsc.nasa.gov/Bios/htmlbios/lockhart.html
254	Loria, Christopher J.	1996-05-01	1960-07-09	2005-02-15	Alive (1/31/17)	Never Flew	Never Flew	1996	35.8111	44.6051				8.79398					0	M	0	1	0	1	1	1	0	0	0	0	www.jsc.nasa.gov/Bios/htmlbios/loria.html
255	Magnus, Sandra H.	1996-05-01	1964-10-30	2012-10-22	Alive (1/31/17)	2002-10-07	2011-07-08	1996	31.5017	47.9781	46.6858	1.29227	15.1841	16.4764	10.0424	8.75017	6.43395	37.9357	0	F	1	1	0	0	0	0	0	0	0	1	www.jsc.nasa.gov/Bios/htmlbios/magnus.html	https://www.aiaa.org/AIAA-Announces-ED/?terms=Dr.%20Sandra%20H.%20Magnus
256	Massimino, Michael J.	1996-05-01	1962-08-19	2014-07-29	Alive (1/31/17)	2002-03-01	2009-05-11	1996	33.7002	51.9425	46.7269	5.21561	13.0267	18.2423	12.4107	7.19507	5.83162	39.5318	0	M	1	1	0	0	0	0	0	0	0	1	www.jsc.nasa.gov/Bios/htmlbios/massimin.html
257	Mastracchio, Richard	1996-05-01	1960-02-11	Current NASA	Alive (1/31/17)	2000-09-08	2013-11-06	1996	36.219		53.7358		17.5168			13.1608	4.35592	40.5749	0	M	0	1	0	0	1	0	0	0	0	1	www.jsc.nasa.gov/Bios/htmlbios/mastracc.html
258	McCool, William C.	1996-05-01	1961-09-23	Died Before Retirement	2003-02-01	2003-01-16	2003-01-16	1996	34.6037		41.3142		6.71047			0	6.71047	41.3142		M	0	1	0	1	0	1	0	1	0	0	www.jsc.nasa.gov/Bios/htmlbios/mccool.html
259	Morin, Lee M. E.	1996-05-01	1952-09-09	Current NASA	Alive (1/31/17)	2002-04-08	2002-04-08	1996	43.6413		49.577		5.93566			0	5.93566	49.577	0	M	1	1	1	1	0	0	1	0	0	1	www.jsc.nasa.gov/Bios/htmlbios/morin.html
260	Nowak, Lisa M.	1996-05-01	1963-05-10	Terminated	Alive (1/31/17)	2006-07-04	2006-07-04	1996	32.9774		43.1513		10.1739			0	10.1739	43.1513	0	F	0	1	0	1	0	0	0	0	0	1	www.jsc.nasa.gov/Bios/htmlbios/nowak.html
261	Pettit, Donald R.	1996-05-01	1955-04-20	Active	Alive (1/31/17)	2002-11-23	2011-12-21	1996	41.0322		56.6708		15.6386			9.07598	6.56263	47.5948	1	M	1	0	0	0	0	0	0	0	0	1	www.jsc.nasa.gov/Bios/htmlbios/pettit.html
262	Phillips, John L.	1996-05-01	1951-04-15	2011-01-15	Alive (1/31/17)	2001-04-19	2009-03-15	1996	45.0459	59.7536	57.9165	1.8371	12.8706	14.7077	9.74127	7.90418	4.96646	50.0123	0	M	1	1	0	1	0	0	0	0	0	1	www.jsc.nasa.gov/Bios/htmlbios/phillips.html	https://lanl.gov/careers/career-options/postdoctoral-research/_assets/docs/biography-phillips-john-l.pdf
263	Polansky, Mark. L.	1996-05-01	1956-06-02	2012-06-30	Alive (1/31/17)	2001-02-09	2009-07-15	1996	39.9124	56.0767	53.117	2.95962	13.2047	16.1643	11.3867	8.4271	4.77755	44.6899	0	M	0	1	0	1	1	1	0	1	0	0	www.jsc.nasa.gov/Bios/htmlbios/polansky.html	http://pingroof.com/astronaut-mark-polansky-leaves-nasa/
264	Richards, Paul W.	1996-05-01	1964-05-20	2002-02-15	Alive (1/31/17)	2001-03-08	2001-03-08	1996	31.948	37.7413	36.7995	0.941821	4.85147	5.79329	0.941821	0	4.85147	36.7995	0	M	0	1	0	1	1	0	1	0	0	1	www.jsc.nasa.gov/Bios/htmlbios/richardsp.html	https://en.wikipedia.org/wiki/Paul_W._Richards
265	Sellers, Piers J.	1996-05-01	1955-04-11	2011-06-05	2016-12-23	2002-10-07	2010-05-14	1996	41.0568	56.1506	55.091	1.05955	14.0342	15.0938	8.65982	7.60027	6.43395	47.4908	0	M	1	0	0	0	1	0	1	0	0	1	www.jsc.nasa.gov/Bios/htmlbios/sellers.html	http://science.gsfc.nasa.gov/sed/bio/piers.j.sellers
266	Stefanyshyn-Piper, Heidemarie M.	1996-05-01	1963-02-07	2009-07-15	Alive (1/31/17)	2006-09-09	2008-11-14	1996	33.2293	46.4339	45.7687	0.665298	12.5394	13.2047	2.84736	2.18207	10.3573	43.5866	0	F	0	1	0	1	0	0	0	0	0	1	www.jsc.nasa.gov/Bios/htmlbios/stefanys.html
267	Tani, Daniel M.	1996-05-01	1961-02-01	2012-08-15	Alive (1/31/17)	2001-12-05	2007-10-23	1996	35.2444	51.5346	46.7214	4.81314	11.4771	16.2902	10.694	5.8809	5.59617	40.8405	0	M	0	1	0	0	0	0	0	0	0	1	www.jsc.nasa.gov/Bios/htmlbios/tani.html
268	Walheim, Rex J.	1996-05-01	1962-10-10	Active	Alive (1/31/17)	2002-04-08	2011-07-08	1996	33.5578		48.742		15.1841			9.24846	5.93566	39.4935	1	M	0	1	0	1	1	0	0	0	0	1	www.jsc.nasa.gov/Bios/htmlbios/walheim.pdf
269	Whitson, Peggy A.	1996-05-01	1960-02-09	Active	Alive (1/31/17)	2002-06-05	2016-11-17	1996	36.2245		56.7721		20.5476			14.4531	6.09446	42.319	1	F	1	0	0	0	1	0	0	0	1	1	www.jsc.nasa.gov/Bios/htmlbios/whitson.html	https://en.wikipedia.org/wiki/Expedition_50
270	Williams, Jeffrey N.	1996-05-01	1958-01-18	Active	Alive (1/31/17)	2000-05-19	2016-07-07	1996	38.2834		58.4668		20.1834			16.1342	4.04928	42.3326	1	M	0	1	0	1	0	0	0	0	0	1	www.jsc.nasa.gov/Bios/htmlbios/williamsj.pdf	https://www.nasa.gov/astronauts/biographies/jeffrey-n-williams
271	Wilson, Stephanie D.	1996-05-01	1966-09-27	Active	Alive (1/31/17)	2006-07-04	2010-04-05	1996	29.5934		43.5209		13.9274			3.75359	10.1739	39.7673	1	F	0	1	0	0	0	0	1	0	0	1	www.jsc.nasa.gov/Bios/htmlbios/wilson.html	https://en.wikipedia.org/wiki/Stephanie_Wilson
272	Anderson, Clayton C.	1998-06-04	1959-02-23	2013-01-15	Alive (1/31/17)	2007-06-08	2010-04-05	1998	39.2772	53.8946	51.1129	2.78166	11.8357	14.6174	5.60712	2.82546	9.01027	48.2875	0	M	0	1	0	0	1	0	0	0	0	1	www.jsc.nasa.gov/Bios/htmlbios/anderson-c.html
273	Archambault, Lee J.	1998-06-04	1960-08-25	2013-03-19	Alive (1/31/17)	2007-06-08	2009-03-15	1998	37.7741	52.564	48.553	4.01095	10.7789	14.7899	5.7796	1.76865	9.01027	46.7844	0	M	0	1	0	1	0	1	0	1	0	0	www.jsc.nasa.gov/Bios/htmlbios/archambault.html	https://en.wikipedia.org/wiki/Lee_Archambault
274	Chamitoff, Gregory E.	1998-06-04	1962-08-06	2013-09-30	Alive (1/31/17)	2008-04-08	2011-05-16	1998	35.8275	51.1513	48.7748	2.37645	12.9473	15.3238	5.47844	3.10198	9.84531	45.6728	0	M	1	1	0	0	0	0	0	0	0	1	www.jsc.nasa.gov/Bios/htmlbios/chamitoff.html
275	Creamer, Timothy J.	1998-06-04	1959-11-15	Current NASA	Alive (1/31/17)	2009-12-21	2009-12-21	1998	38.5517		50.0999		11.5483			0	11.5483	50.0999	0	M	0	1	0	1	1	0	1	0	0	0	www.jsc.nasa.gov/Bios/htmlbios/creamer.html
276	Dyson, Tracy C.	1998-06-04	1969-08-14	Active	Alive (1/31/17)	2007-08-08	2010-04-02	1998	28.8049		40.6324		11.8275			2.65024	9.17728	37.9822	1	F	1	0	0	0	0	0	0	0	0	1	www.jsc.nasa.gov/Bios/htmlbios/caldwell.html
277	Ferguson, Christopher J.	1998-06-04	1961-09-01	2011-12-09	Alive (1/31/17)	2006-09-09	2011-07-08	1998	36.7556	50.2697	49.848	0.421629	13.0924	13.514	5.24846	4.82683	8.26557	45.0212	0	M	0	1	0	1	0	1	0	1	0	0	www.jsc.nasa.gov/Bios/htmlbios/ferguson.html
278	Foreman, Michael J.	1998-06-04	1957-03-29	2015-07-31	Alive (1/31/17)	2008-03-11	2009-11-16	1998	41.1828	58.3381	52.6352	5.70294	11.4524	17.1554	7.38672	1.68378	9.76865	50.9514	0	M	0	1	0	1	0	0	1	0	0	1	www.jsc.nasa.gov/Bios/htmlbios/foreman.html	http://venturioutcomes.com/mike-foreman/
279	Fossum, Michael E.	1998-06-04	1957-12-19	Active	Alive (1/31/17)	2006-07-04	2011-06-07	1998	40.4572		53.4648		13.0075			4.92539	8.08214	48.5394	1	M	0	1	0	1	1	0	0	0	0	1	www.jsc.nasa.gov/Bios/htmlbios/fossum.html
280	Ham, Kenneth T.	1998-06-04	1964-12-12	2012-05-31	Alive (1/31/17)	2008-05-31	2010-05-14	1998	33.4757	47.4661	45.4182	2.04791	11.9425	13.9904	4	1.95209	9.99042	43.4661	0	M	0	1	0	1	0	1	0	1	0	0	www.jsc.nasa.gov/Bios/htmlbios/ham.html
281	Johnson, Gregory C.	1998-06-04	1954-07-30	Not Applicable	Alive (1/31/17)	2009-05-11	2009-05-11	1998	43.8467		54.7817		10.935			0	10.935	54.7817	0	M	0	0	0	1	1	1	1	1	0	0	www.jsc.nasa.gov/Bios/htmlbios/johnson-gc.html
282	Johnson, Gregory H.	1998-06-04	1962-05-12	2013-08-26	Alive (1/31/17)	2008-03-11	2011-05-16	1998	36.063	51.2909	49.0103	2.28063	12.9473	15.2279	5.45927	3.17864	9.76865	45.8316	0	M	0	1	0	1	0	1	0	1	0	0	www.jsc.nasa.gov/Bios/htmlbios/johnson-gh.html	http://www.spaceref.com/news/viewpr.html?pid=41419
283	Love, Stanley G.	1998-06-04	1965-06-08	Current NASA	Alive (1/31/17)	2008-02-07	2008-02-07	1998	32.9884		42.6667		9.6783			0	9.6783	42.6667	0	M	1	1	0	0	0	0	1	0	0	1	www.jsc.nasa.gov/Bios/htmlbios/love.html	https://en.wikipedia.org/wiki/Stanley_G._Love	https://en.wikipedia.org/wiki/STS-122#Crew
284	Melvin, Leland D.	1998-06-04	1964-02-15	2014-02-15	Alive (1/31/17)	2008-02-07	2009-11-16	1998	34.2998	50.0014	45.7522	4.24914	11.4524	15.7016	6.02327	1.77413	9.6783	43.9781	0	M	0	1	0	0	1	0	0	0	0	1	www.jsc.nasa.gov/Bios/htmlbios/melvin.html
285	Morgan, Barbara R.	1998-06-04	1951-11-28	2008-08-15	Alive (1/31/17)	2007-08-08	2007-08-08	1998	46.5161	56.7146	55.6934	1.02122	9.17728	10.1985	1.02122	0	9.17728	55.6934	0	F	0	0	0	0	0	0	0	0	0	1	www.jsc.nasa.gov/Bios/htmlbios/morgan.html
286	Oefelein, William A.	1998-06-04	1965-03-29	Terminated	Alive (1/31/17)	2006-12-09	2006-12-09	1998	33.1828		41.6975		8.51472			0	8.51472	41.6975	0	M	0	1	0	1	0	1	0	1	0	0	www.jsc.nasa.gov/Bios/htmlbios/oefelein.html	http://www.reuters.com/article/us-usa-astronaut-idUSN2585185420070526
287	Olivas, John D.	1998-06-04	1966-05-25	2010-05-25	Alive (1/31/17)	2007-06-08	2009-08-28	1998	32.0274	44	43.2608	0.73922	11.2334	11.9726	2.96235	2.22313	9.01027	41.0376	0	M	1	1	0	0	1	0	0	0	0	1	www.jsc.nasa.gov/Bios/htmlbios/olivas.html
288	Patrick, Nicholas J. M.	1998-06-04	1964-11-19	2012-05-31	Alive (1/31/17)	2006-12-09	2010-02-08	1998	33.5387	47.5291	45.2211	2.30801	11.6824	13.9904	5.4757	3.16769	8.51472	42.0534	0	M	1	1	0	1	0	0	0	0	0	1	www.jsc.nasa.gov/Bios/htmlbios/patrick.html
289	Poindexter, Alan G.	1998-06-04	1961-11-05	2010-12-15	2012-07-01	2008-02-07	2010-04-05	1998	36.5777	49.1088	48.4134	0.695414	11.8357	12.5311	2.85284	2.15743	9.6783	46.256	0	M	0	1	0	1	0	1	0	1	0	0	www.jsc.nasa.gov/Bios/htmlbios/poindexter.html	https://en.wikipedia.org/wiki/Alan_G._Poindexter	https://en.wikipedia.org/wiki/STS-122#Crew
290	Reisman, Garrett E.	1998-06-04	1968-02-10	2011-03-15	Alive (1/31/17)	2008-03-11	2010-05-14	1998	30.3135	43.091	42.256	0.835044	11.9425	12.7775	3.0089	2.17385	9.76865	40.0821	0	M	1	1	0	0	0	0	0	0	0	1	www.jsc.nasa.gov/Bios/htmlbios/reisman.html
291	Robertson, Partricia H.	1998-06-04	1963-03-12	Died Before Retirement	2001-05-24	Never Flew	Never Flew	1998	35.2307										0	F	0	0	1	0	1	0	0	0	0	0	www.jsc.nasa.gov/Bios/htmlbios/hilliard.html	https://en.wikipedia.org/wiki/Patricia_Robertson
292	Swanson, Steven R.	1998-06-04	1960-12-03	2015-08-30	Alive (1/31/17)	2007-06-08	2014-03-25	1998	37.5003	54.7379	53.306	1.4319	15.8056	17.2375	8.22724	6.79535	9.01027	46.5106	0	M	1	1	0	0	1	0	0	0	0	1	www.jsc.nasa.gov/Bios/htmlbios/swanson.html	http://www.nasa.gov/press-release/three-time-spaceflight-astronaut-steven-swanson-retires-from-nasa	http://www.space.com/3470-astronaut-biography-steven-swanson.html
293	Wheelock, Douglas H.	1998-06-04	1960-05-05	Active	Alive (1/31/17)	2007-10-23	2010-06-15	1998	38.0808		50.1109		12.0301			2.64476	9.38535	47.4661	1	M	0	1	0	1	1	0	0	0	0	1	www.jsc.nasa.gov/Bios/htmlbios/wheelock.html	https://en.wikipedia.org/wiki/Douglas_H._Wheelock
294	Williams, Sunita L.	1998-06-04	1965-09-19	Active	Alive (1/31/17)	2006-12-09	2012-07-14	1998	32.7064		46.8172		14.1109			5.59617	8.51472	41.2211	1	F	0	1	0	1	0	0	0	0	0	1	www.jsc.nasa.gov/Bios/htmlbios/williams-s.pdf
295	Woodward III, Neil W.	1998-06-04	1962-07-26	2008-10-15	Alive (1/31/17)	Never Flew	Never Flew	1998	35.8576	46.2231				10.3655					0	M	0	1	0	1	0	0	0	0	0	0	www.jsc.nasa.gov/Bios/htmlbios/woodward.html	http://www.spacefacts.de/bios/astronauts/english/woodward_neil.htm
296	Zamka, George D.	1998-06-04	1962-06-29	2013-03-11	Alive (1/31/17)	2007-10-23	2010-02-08	1998	35.9316	50.6995	47.614	3.08556	11.6824	14.768	5.38261	2.29706	9.38535	45.3169	0	M	0	1	0	1	0	1	0	1	0	0	www.jsc.nasa.gov/Bios/htmlbios/zamka.html	https://www.nasa.gov/centers/johnson/news/releases/2013/J13-006.html#.WDXhRLIrJhE	https://en.wikipedia.org/wiki/George_D._Zamka
297	Antonelli, Dominic A.	2000-07-26	1967-08-23	2015-07-10	Alive (1/31/17)	2009-03-15	2010-05-14	2000	32.9254	47.8795	42.7242	5.15537	9.79877	14.9541	6.31896	1.16359	8.63518	41.5606	0	M	0	1	0	1	0	1	0	1	0	0	www.jsc.nasa.gov/Bios/htmlbios/antonelli-da.html	https://en.wikipedia.org/wiki/Dominic_A._Antonelli	http://www.spaceflightinsider.com/space-centers/johnson-space-center/astronaut-tony-antonelli-leaves-nasa-after-15-year-career/
298	Barratt, Michael R.	2000-07-26	1959-04-16	Active	Alive (1/31/17)	2009-03-26	2011-02-24	2000	41.2786		51.8604		10.5818			1.9165	8.6653	49.9439	1	M	0	1	1	0	1	0	0	0	0	1	www.jsc.nasa.gov/Bios/htmlbios/barratt-mr.html	https://en.wikipedia.org/wiki/Michael_Barratt_(astronaut)
299	Behnken, Robert L.	2000-07-26	1970-07-28	Active	Alive (1/31/17)	2008-03-11	2010-02-08	2000	29.9959		39.5346		9.53867			1.91376	7.62491	37.6208	1	M	1	1	0	1	0	0	0	0	0	1	www.jsc.nasa.gov/Bios/htmlbios/behnken-rl.pdf	https://en.wikipedia.org/wiki/Robert_L._Behnken
300	Boe, Eric A.	2000-07-26	1964-10-01	Active	Alive (1/31/17)	2008-11-14	2011-02-24	2000	35.8166		46.3984		10.5818			2.27789	8.3039	44.1205	1	M	0	1	0	1	0	1	0	1	0	0	www.jsc.nasa.gov/Bios/htmlbios/boe-ea.pdf	https://en.wikipedia.org/wiki/Eric_Boe
301	Bowen, Stephen G.	2000-07-26	1964-02-13	Active	Alive (1/31/17)	2008-11-14	2011-02-24	2000	36.449		47.0308		10.5818			2.27789	8.3039	44.7529	1	M	0	1	0	1	0	0	0	0	0	1	www.jsc.nasa.gov/Bios/htmlbios/bowen-sg.html	https://en.wikipedia.org/wiki/Stephen_Bowen_(astronaut)
302	Drew Jr., Benjamin A.	2000-07-26	1962-11-05	2013-10-15	Alive (1/31/17)	2007-08-08	2011-02-24	2000	37.7221	50.9432	48.3039	2.63929	10.5818	13.2211	6.18754	3.54825	7.03354	44.7556	0	M	0	1	0	1	0	0	1	0	0	1	www.jsc.nasa.gov/Bios/htmlbios/drew-ba.html	https://forum.nasaspaceflight.com/index.php?topic=740.2480	https://www.nasa.gov/mission_pages/shuttle/shuttlemissions/sts133/main/index.html
303	Feustel, Andrew J.	2000-07-26	1965-08-25	Active	Alive (1/31/17)	2009-05-11	2011-05-16	2000	34.9185		45.7221		10.8036			2.01232	8.79124	43.7098	1	M	1	1	0	0	0	0	0	0	0	1	www.jsc.nasa.gov/Bios/htmlbios/feustel-aj.html	https://en.wikipedia.org/wiki/Andrew_J._Feustel
304	Ford, Kevin A.	2000-07-26	1960-07-07	2016-01-29	Alive (1/31/17)	2009-08-28	2012-10-23	2000	40.052	55.5619	52.2957	3.26626	12.2437	15.5099	6.42026	3.154	9.08966	49.1417	0	M	1	1	0	1	0	1	1	1	0	0	www.jsc.nasa.gov/Bios/htmlbios/ford-ka.html	https://en.wikipedia.org/wiki/Kevin_A._Ford	https://www.nasa.gov/press-release/veteran-astronaut-kevin-ford-departs-nasa
305	Garan Jr., Ronald J.	2000-07-26	1961-10-30	2012-12-15	Alive (1/31/17)	2008-05-31	2011-04-04	2000	38.7379	51.1266	49.4264	1.70021	10.6886	12.3888	4.54209	2.84189	7.84668	46.5845	0	M	0	1	0	1	0	1	0	0	0	1	www.jsc.nasa.gov/Bios/htmlbios/garan-rj.html	https://en.wikipedia.org/wiki/Ronald_J._Garan_Jr.
306	Good, Michael T.	2000-07-26	1962-10-13	2012-04-15	Alive (1/31/17)	2009-05-11	2010-05-14	2000	37.7851	49.5058	47.5838	1.92197	9.79877	11.7207	2.9295	1.00753	8.79124	46.5763	0	M	0	1	0	1	0	0	1	0	0	1	www.jsc.nasa.gov/Bios/htmlbios/good-mt.html	https://en.wikipedia.org/wiki/Michael_T._Good
307	Hurley, Douglas G.	2000-07-26	1966-10-21	Active	Alive (1/31/17)	2009-07-15	2011-07-08	2000	33.7632		44.7118		10.9487			1.97947	8.9692	42.7324	1	M	0	0	0	1	0	1	0	1	0	0	www.jsc.nasa.gov/Bios/htmlbios/hurley-dg.html	https://en.wikipedia.org/wiki/Douglas_G._Hurley
308	Kopra, Timothy L.	2000-07-26	1963-04-09	Active	Alive (1/31/17)	2009-07-15	2015-12-15	2000	37.2977		52.6845		15.3867			6.41752	8.9692	46.2669	1	M	0	1	0	1	1	0	0	0	0	1	www.jsc.nasa.gov/Bios/htmlbios/kopra-tl.html	https://en.wikipedia.org/wiki/Timothy_Kopra
309	McArthur, Katherine M.	2000-07-26	1971-08-30	Active	Alive (1/31/17)	2009-05-11	2009-05-11	2000	28.9062		37.6975		8.79124			0	8.79124	37.6975	1	F	1	0	0	0	0	0	0	0	0	1	www.jsc.nasa.gov/Bios/htmlbios/mcarthur-km.html	https://en.wikipedia.org/wiki/K._Megan_McArthur
310	Nyberg, Karen L.	2000-07-26	1969-10-07	Active	Alive (1/31/17)	2008-05-31	2013-05-28	2000	30.8008		43.6386		12.8378			4.9911	7.84668	38.6475	1	F	1	1	0	0	1	0	0	0	0	1	www.jsc.nasa.gov/Bios/htmlbios/nyberg-kl.html	https://en.wikipedia.org/wiki/Karen_L._Nyberg
311	Stott, Nicole P.	2000-07-26	1962-11-19	2015-05-31	Alive (1/31/17)	2009-08-28	2011-02-24	2000	37.6838	52.5284	48.2656	4.26283	10.5818	14.8446	5.75496	1.49213	9.08966	46.7734	0	F	0	1	0	0	1	0	0	0	0	1	www.jsc.nasa.gov/Bios/htmlbios/stott-np.pdf	https://en.wikipedia.org/wiki/Nicole_Stott	https://www.nasa.gov/press-release/astronaut-nicole-stott-retires-from-nasa-0
312	Virts Jr., Terry W.	2000-07-26	1967-12-01	2016-08-23	Alive (1/31/17)	2010-02-08	2014-11-23	2000	32.6516	48.7283	46.9788	1.74949	14.3272	16.0767	6.53799	4.7885	9.53867	42.1903	0	M	0	1	0	1	0	1	0	1	0	0	www.jsc.nasa.gov/Bios/htmlbios/virts-tw.pdf	https://en.wikipedia.org/wiki/Terry_W._Virts	https://www.nasa.gov/press-release/veteran-astronaut-terry-virts-retires-from-nasa
313	Wilmore, Barry E. "Butch"	2000-07-26	1962-12-29	Active	Alive (1/31/17)	2009-11-16	2014-09-25	2000	37.5743		51.7399		14.1656			4.85695	9.30869	46.883	1	M	0	1	0	1	0	1	0	1	0	0	www.jsc.nasa.gov/Bios/htmlbios/wilmore-be.html	https://en.wikipedia.org/wiki/Karen_L._Nyberg
314	Acaba, Joseph M.	2004-05-06	1967-05-17	Active	Alive (1/31/17)	2009-03-15	2012-05-15	2004	36.9719		44.9966		8.02464			3.16769	4.85695	41.8289	1	M	0	1	0	1	0	0	0	0	0	1	www.jsc.nasa.gov/Bios/htmlbios/acaba-jm.html	https://en.wikipedia.org/wiki/Joseph_M._Acaba	http://www.jsc.nasa.gov/Bios/04class.html
315	Arnold II, Richard R.	2004-05-06	1963-11-26	Active	Alive (1/31/17)	2009-03-15	2009-03-15	2004	40.4435		45.3005		4.85695			0	4.85695	45.3005	1	M	0	1	0	1	0	0	0	0	0	1	www.jsc.nasa.gov/Bios/htmlbios/arnold-rr.html	https://en.wikipedia.org/wiki/Richard_R._Arnold	http://www.jsc.nasa.gov/Bios/04class.html
316	Bresnik, Randolph "Komrade"	2004-05-06	1967-09-11	Active	Alive (1/31/17)	2009-11-16	2017-05-15	2004	36.6516		49.6756		13.024			7.4935	5.53046	42.1821	1	M	0	1	0	1	0	1	0	0	0	1	www.jsc.nasa.gov/Bios/htmlbios/bresnik-rj.html	https://en.wikipedia.org/wiki/Randolph_Bresnik	http://www.jsc.nasa.gov/Bios/04class.html
317	Cassidy, Christopher J.	2004-05-06	1970-01-04	Active	Alive (1/31/17)	2009-07-15	2013-03-28	2004	34.3354		43.2279		8.89254			3.70157	5.19097	39.5264	1	M	0	1	0	1	0	0	0	0	0	1	www.jsc.nasa.gov/Bios/htmlbios/cassidy-cj.pdf	https://en.wikipedia.org/wiki/Christopher_Cassidy	http://www.jsc.nasa.gov/Bios/04class.html
318	Dutton Jr., James P.	2004-05-06	1968-11-20	2012-06-15	Alive (1/31/17)	2010-04-05	2010-04-05	2004	35.4579	43.5674	41.3717	2.19576	5.91376	8.10951	2.19576	0	5.91376	41.3717	0	M	0	1	0	1	0	1	0	1	0	0	www.jsc.nasa.gov/Bios/htmlbios/dutton-jp.html	https://en.wikipedia.org/wiki/James_Dutton_(astronaut)	http://www.jsc.nasa.gov/Bios/04class.html
319	Hernández, José M.	2004-05-06	1962-08-07	2011-01-14	Alive (1/31/17)	2009-08-28	2009-08-28	2004	41.7467	48.4381	47.0582	1.37988	5.31143	6.69131	1.37988	0	5.31143	47.0582	0	M	0	1	0	0	1	0	0	0	0	1	www.jsc.nasa.gov/Bios/htmlbios/hernandez-jm.html	https://en.wikipedia.org/wiki/Jos%C3%A9_M._Hern%C3%A1ndez	http://www.jsc.nasa.gov/Bios/04class.html
320	Kimbrough, Robert S.	2004-05-06	1967-06-04	Active	Alive (1/31/17)	2016-10-19	2016-10-19	2004	36.9227		49.3771		12.4545			0	12.4545	49.3771	1	M	0	1	0	1	1	0	0	0	0	1	www.jsc.nasa.gov/Bios/htmlbios/kimbrough-rs.html	https://en.wikipedia.org/wiki/Robert_S._Kimbrough	http://www.jsc.nasa.gov/Bios/04class.html
321	Marshburn, Thomas H.	2004-05-06	1960-08-29	Active	Alive (1/31/17)	2009-07-15	2012-12-19	2004	43.6851		52.3066		8.62149			3.43053	5.19097	48.8761	1	M	0	1	1	0	1	0	0	0	0	1	www.jsc.nasa.gov/Bios/htmlbios/marshburn-th.pdf	https://en.wikipedia.org/wiki/Thomas_Marshburn	http://www.jsc.nasa.gov/Bios/04class.html
322	Metalf-Lindenburger, Dorothy M.	2004-05-06	1975-05-02	2014-06-13	Alive (1/31/17)	2010-04-05	2010-04-05	2004	29.013	39.1157	34.9268	4.18891	5.91376	10.1027	4.18891	0	5.91376	34.9268	0	F	0	0	0	0	0	0	0	0	0	1	www.jsc.nasa.gov/Bios/htmlbios/metcalf-lindenburger-dm.html	https://en.wikipedia.org/wiki/List_of_astronauts_by_year_of_selection	http://www.jsc.nasa.gov/Bios/04class.html
323	Satcher, Robert L.	2004-05-06	1965-09-22	2011-09-15	Alive (1/31/17)	2009-11-16	2009-11-16	2004	38.6201	45.9795	44.1506	1.82888	5.53046	7.35934	1.82888	0	5.53046	44.1506	0	M	1	0	1	0	0	0	0	0	0	1	www.jsc.nasa.gov/Bios/htmlbios/satcher-rl.html	https://en.wikipedia.org/wiki/Robert_Satcher	http://www.jsc.nasa.gov/Bios/04class.html
324	Walker, Shannon	2004-05-06	1965-06-04	Active	Alive (1/31/17)	2010-06-15	2010-06-15	2004	38.9213		45.0294		6.10815			0	6.10815	45.0294	1	F	1	1	0	0	1	0	0	0	0	0	www.jsc.nasa.gov/Bios/htmlbios/walker-s.pdf	https://en.wikipedia.org/wiki/Shannon_Walker	http://www.jsc.nasa.gov/Bios/04class.html
325	Auñón-Chancellor, Serena	2009-06-29	1976-04-09	Active	Alive (1/31/17)	Never Flew	Never Flew	2009	33.2211										1	F	0	0	1	0	1	0	0	0	0	0	www.jsc.nasa.gov/Bios/htmlbios/aunon.html	https://en.wikipedia.org/wiki/Serena_M._Au%C3%B1%C3%B3n
326	Epps, Jeanette J.	2009-06-29	1970-11-03	Active	Alive (1/31/17)	Never Flew	Never Flew	2009	38.653										1	F	1	1	0	0	0	0	0	0	0	0	www.jsc.nasa.gov/Bios/htmlbios/epps-jj.html	https://en.wikipedia.org/wiki/Jeanette_J._Epps
327	Fischer, Jack D.	2009-06-29	1974-01-23	Active	Alive (1/31/17)	2017-03-15	2017-03-15	2009	35.4305		43.1403		7.70979			0	7.70979	43.1403	1	M	0	1	0	1	0	0	0	0	0	1	www.jsc.nasa.gov/Bios/htmlbios/fischer-jack.html	https://en.wikipedia.org/wiki/Jack_D._Fischer	https://www.nasa.gov/mission_pages/station/expeditions/future.html
328	Hopkins, Michael S.	2009-06-29	1968-12-28	Active	Alive (1/31/17)	2014-09-25	2014-09-25	2009	40.501		45.7413		5.24025			0	5.24025	45.7413	1	M	0	1	0	1	0	0	0	0	0	0	www.jsc.nasa.gov/Bios/htmlbios/hopkins-ms.html	https://en.wikipedia.org/wiki/Michael_S._Hopkins
329	Lindgren, Kjell N.	2009-06-29	1973-01-23	Active	Alive (1/31/17)	2015-07-22	2015-07-22	2009	36.4298		42.4914		6.0616			0	6.0616	42.4914	1	M	0	1	1	1	0	0	0	0	0	0	www.jsc.nasa.gov/Bios/htmlbios/lindgren-kn.html	https://en.wikipedia.org/wiki/Kjell_N._Lindgren
330	Rubins, Kathleen "Kate"	2009-06-29	1978-10-14	Active	Alive (1/31/17)	2016-07-07	2016-07-07	2009	30.7077		37.7303		7.02259			0	7.02259	37.7303	1	F	1	0	0	0	0	0	0	0	0	0	www.jsc.nasa.gov/Bios/htmlbios/rubins-k.html	https://en.wikipedia.org/wiki/Kathleen_Rubins
331	Tingle, Scott D.	2009-06-29	1965-07-19	Active	Alive (1/31/17)	2017-10-15	2017-10-15	2009	43.9452		52.2409		8.29569			0	8.29569	52.2409	1	M	0	1	0	1	0	1	0	0	0	0	www.jsc.nasa.gov/Bios/htmlbios/tingle.html	https://en.wikipedia.org/wiki/Scott_D._Tingle
332	Vande Hei, Mark T.	2009-06-29	1966-11-10	Active	Alive (1/31/17)	2017-09-15	2017-09-15	2009	42.6338		50.8474		8.21355			0	8.21355	50.8474	1	M	0	1	0	1	1	1	0	0	0	0	www.jsc.nasa.gov/Bios/htmlbios/vande-hei.html	https://en.wikipedia.org/wiki/Mark_T._Vande_Hei
333	Wiseman, Gregory R.	2009-06-29	1975-11-11	Active	Alive (1/31/17)	2014-05-29	2014-05-29	2009	33.6318		38.5462		4.91444			0	4.91444	38.5462	1	M	0	1	0	1	0	1	0	0	0	0	www.jsc.nasa.gov/Bios/htmlbios/wiseman.html	https://en.wikipedia.org/wiki/Gregory_R._Wiseman
334	Cassada, Josh A.	2013-06-17	1973-07-18	Active	Alive (1/31/17)	Never Flew	Never Flew	2013	39.9151										1	M	1	1	0	1	0	1	0	0	0	0	www.jsc.nasa.gov/Bios/htmlbios/cassada-ja.pdf	https://en.wikipedia.org/wiki/Josh_A._Cassada
335	Glover Jr., Victor J.	2013-06-17	1976-04-30	Active	Alive (1/31/17)	Never Flew	Never Flew	2013	37.1307										1	M	0	1	0	1	0	1	0	0	0	0	www.jsc.nasa.gov/Bios/htmlbios/glover-vj.pdf	https://en.wikipedia.org/wiki/Victor_J._Glover
336	Hague, Tyler N.	2013-06-17	1975-09-24	Active	Alive (1/31/17)	Never Flew	Never Flew	2013	37.7303										1	M	0	1	0	1	0	1	0	0	0	0	http://www.jsc.nasa.gov/Bios/htmlbios/hague-tn.pdf	https://en.wikipedia.org/wiki/Nick_Hague
337	Koch, Christina H. Hammock	2013-06-17	1979-02-02	Active	Alive (1/31/17)	Never Flew	Never Flew	2013	34.371										1	F	0	1	0	0	1	0	0	0	0	0	www.jsc.nasa.gov/Bios/htmlbios/hammock-cm.pdf	https://www.nasa.gov/astronauts/2013_hague.html
338	Mann, Nicole A.	2013-06-17	1977-06-27	Active	Alive (1/31/17)	Never Flew	Never Flew	2013	35.9726										1	F	0	1	0	1	0	1	0	0	0	0	www.jsc.nasa.gov/Bios/htmlbios/mann-na.pdf	https://en.wikipedia.org/wiki/Nicole_Aunapu_Mann
339	McClain, Anne C.	2013-06-17	1979-06-07	Active	Alive (1/31/17)	Never Flew	Never Flew	2013	34.0287										1	F	0	1	0	1	0	1	0	0	0	0	www.jsc.nasa.gov/Bios/htmlbios/mcclain-ac.pdf	https://en.wikipedia.org/wiki/Nicole_Aunapu_Mann
340	Meir, Jessica U.	2013-06-17	1977-07-01	Active	Alive (1/31/17)	Never Flew	Never Flew	2013	35.9617										1	F	1	1	0	0	0	1	0	0	0	0	www.jsc.nasa.gov/Bios/htmlbios/meir-ju.pdf	www.jsc.nasa.gov/Bios/htmlbios/meir-ju.pdf
341	Morgan, Andrew R.	2013-06-17	1976-02-05	Active	Alive (1/31/17)	Never Flew	Never Flew	2013	37.3634										1	M	0	0	1	1	0	0	0	0	0	0	www.jsc.nasa.gov/Bios/htmlbios/morgan-ar.pdf	https://en.wikipedia.org/wiki/Andrew_R._Morgan
342	Acton, Loren W.	Not Announced	1936-03-07	1985-08-06	Alive (1/31/17)	1985-07-29	1985-07-29			49.4155	49.3936	0.0219028			0.0219028	0		49.3936	0	M	1	0	0	0	0	0	0	0	1	0	http://www.jsc.nasa.gov/Bios/htmlbios/acton-lw.html	https://en.wikipedia.org/wiki/Loren_Acton
343	Bartoe, John-David F.	Not Announced	1944-11-17	1985-08-06	Alive (1/31/17)	1985-07-29	1985-07-29			40.7173	40.6954	0.0219028			0.0219028	0		40.6954	0	M	1	1	0	0	1	0	0	0	1	0	http://www.spacefacts.de/bios/astronauts/english/bartoe_john.htm	http://www.jsc.nasa.gov/Bios/PS/bartoe.html
344	Buckey, Jay Clark	Not Announced	1956-06-06	1998-05-03	Alive (1/31/17)	1998-04-17	1998-04-17			41.9055	41.8617	0.0438056			0.0438056	0		41.8617	0	M	0	0	1	0	0	0	0	0	1	0	http://www.jsc.nasa.gov/Bios/PS/buckey.html
345	Cenker, Robert J.	Not Announced	1948-11-05	1986-01-18	Alive (1/31/17)	1986-01-12	1986-01-12			37.2019	37.1855	0.0164271			0.0164271	0		37.1855	0	M	0	1	0	0	0	0	0	0	1	0	http://www.jsc.nasa.gov/Bios/PS/cenker.html	https://en.wikipedia.org/wiki/Robert_J._Cenker
346	Crouch, Roger K.	Not Announced	1940-09-12	1997-07-17	Alive (1/31/17)	1997-04-08	1997-07-01			56.8433	56.7995	0.0438056			0.273785	0.229979		56.5695	0	M	1	1	0	0	0	0	0	0	1	0	http://www.jsc.nasa.gov/Bios/PS/crouch.html	http://www.spacefacts.de/bios/astronauts/english/crouch_roger.htm
347	Delucas, Lawrence J.	Not Announced	1950-07-11	1992-07-09	Alive (1/31/17)	1992-06-25	1992-06-25			41.9959	41.9576	0.0383299			0.0383299	0		41.9576	0	M	1	1	0	0	0	0	0	0	1	0	http://www.jsc.nasa.gov/Bios/PS/delucas.html	http://www.spacefacts.de/bios/astronauts/english/delucas_lawrence.htm
348	Durrance, Samuel T.	Not Announced	1943-09-17	1995-03-18	Alive (1/31/17)	1990-12-02	1995-03-02			51.499	51.4552	0.0438056			4.29021	4.24641		47.2088	0	M	1	1	0	0	0	0	0	0	1	0	http://www.jsc.nasa.gov/Bios/PS/durrance.html	https://en.wikipedia.org/wiki/STS-35	http://www.spacefacts.de/bios/astronauts/english/durrance_samuel.htm
349	Fettman, Martin J.	Not Announced	1956-12-31	1993-11-01	Alive (1/31/17)	1993-10-18	1993-10-18			36.835	36.7967	0.0383299			0.0383299	0		36.7967	0	M	1	1	0	0	0	0	0	0	1	0	http://www.jsc.nasa.gov/Bios/PS/fettman.html
350	Gaffney, F. Drew	Not Announced	1946-06-09	1991-06-14	Alive (1/31/17)	1991-06-05	1991-06-05			45.013	44.9884	0.0246407			0.0246407	0		44.9884	0	M	0	0	1	1	0	0	0	0	1	0	http://www.jsc.nasa.gov/Bios/htmlbios/gaffney-fa.html	https://en.wikipedia.org/wiki/STS-40
351	Garn, Jake	Not Announced	1932-10-12	1985-04-19	Alive (1/31/17)	1985-04-12	1985-04-12			52.5175	52.4983	0.019165			0.019165	0		52.4983	0	M	0	0	0	1	0	0	0	0	1	0	http://www.jsc.nasa.gov/Bios/htmlbios/garn-j.html
352	Hennen, Thomas J.	Not Announced	1952-08-17	1991-12-01	Alive (1/31/17)	1991-11-24	1991-11-24			39.2882	39.269	0.019165			0.019165	0		39.269	0	M	0	0	0	1	0	0	0	0	1	0	http://www.jsc.nasa.gov/Bios/PS/hennen.html	http://www.spacefacts.de/bios/astronauts/english/hennen_thomas.htm
353	Hughes-Fulford, Millie	Not Announced	1945-12-21	1991-06-14	Alive (1/31/17)	1991-06-05	1991-06-05			45.4784	45.4538	0.0246407			0.0246407	0		45.4538	0	F	1	0	0	0	0	0	0	0	1	0	http://www.jsc.nasa.gov/Bios/PS/hughes-fulford.html	https://en.wikipedia.org/wiki/STS-40	http://www.spacefacts.de/bios/astronauts/english/hughes-fulford_millie.htm
354	Jarvis, Gregory B.	Not Announced	1944-08-24	Died Before Retirement	1986-01-28	1986-01-28	1986-01-28				41.4292					0		41.4292	0	M	0	1	0	1	0	0	0	0	1	0	http://www.jsc.nasa.gov/Bios/htmlbios/jarvis.html	https://en.wikipedia.org/wiki/Gregory_Jarvis
355	Leslie, Fred W.	Not Announced	1951-12-19	1995-11-05	Alive (1/31/17)	1995-10-20	1995-10-20			43.8795	43.8357	0.0438056			0.0438056	0		43.8357	0	M	1	1	0	0	1	0	0	0	1	0	http://www.jsc.nasa.gov/Bios/PS/leslie.html	https://en.wikipedia.org/wiki/Frederick_W._Leslie
356	Lichtenberg, Byron K.	Not Announced	1948-02-19	1992-04-02	Alive (1/31/17)	1983-11-28	1992-03-24			44.1177	44.0931	0.0246407			8.34497	8.32033		35.7728	0	M	1	1	0	0	0	0	0	0	1	0	http://www.jsc.nasa.gov/Bios/htmlbios/lichtenberg-bk.html	https://en.wikipedia.org/wiki/STS-9	http://www.spacefacts.de/bios/astronauts/english/lichtenberg_byron.htm
357	Linteris, Gregory T.	Not Announced	1957-10-04	1997-07-17	Alive (1/31/17)	1997-04-04	1997-07-01			39.7837	39.7399	0.0438056			0.284736	0.240931		39.499	0	M	1	1	0	0	0	0	0	0	1	0	http://www.jsc.nasa.gov/Bios/PS/linteris.html
358	Nelson, C. W.	Not Announced	1942-09-29	1986-01-18	Alive (1/31/17)	1986-01-12	1986-01-12			43.3046	43.2882	0.0164271			0.0164271	0		43.2882	0	M	0	0	0	0	0	0	0	0	1	1	http://www.jsc.nasa.gov/Bios/htmlbios/nelson-b.html	http://www.spacefacts.de/bios/astronauts/english/nelson_william.htm
359	Pailes, William A.	Not Announced	1952-06-26	1987-07-15	Alive (1/31/17)	1985-10-03	1985-10-03			35.05	33.2704	1.7796			1.7796	0		33.2704	0	M	0	1	0	1	0	0	0	0	1	0	http://www.jsc.nasa.gov/Bios/htmlbios/pailes-wa.html
360	Parise, Ronald A.	Not Announced	1951-05-24	Not Applicable	2008-05-09	1990-12-02	1995-03-02				43.7728					4.24641		39.5264	0	M	1	1	0	0	1	0	0	0	1	0	http://science.ksc.nasa.gov/mirrors/msfc/crew/parise.html
361	Pawelczyk, James A.	Not Announced	1960-09-20	Current NASA	Alive (1/31/17)	1998-04-17	1998-04-17				37.5715					0		37.5715	0	M	1	1	0	0	0	0	0	0	1	0	http://www.jsc.nasa.gov/Bios/PS/pawelczy.html
362	Payton, Gary E.	Not Announced	1948-06-20	1985-08-15	Alive (1/31/17)	1985-01-24	1985-01-24			37.1526	36.5969	0.555784			0.555784	0		36.5969	0	M	0	1	0	1	0	1	0	0	1	0	http://www.jsc.nasa.gov/Bios/htmlbios/payton-ge.html	http://www.spacefacts.de/bios/astronauts/english/payton_gary.htm
363	Sacco, Jr., Albert	Not Announced	1949-05-03	1995-11-05	Alive (1/31/17)	1995-10-20	1995-10-20			46.5079	46.4641	0.0438056			0.0438056	0		46.4641	0	M	1	0	0	0	0	0	0	0	1	0	http://www.jsc.nasa.gov/Bios/PS/sacco.html	http://www.spacefacts.de/bios/astronauts/english/sacco_albert.htm
364	Scully-Power, Paul D.	Not Announced	1944-05-28	Current NASA	Alive (1/31/17)	1984-10-05	1984-10-05				40.3559					0		40.3559	0	M	0	0	0	0	1	0	0	0	1	0	http://www.jsc.nasa.gov/Bios/htmlbios/scullypower-pd.html
365	Trinh, Eugene H.	Not Announced	1950-09-14	1992-07-09	Alive (1/31/17)	1992-06-25	1992-06-25			41.8179	41.7796	0.0383299			0.0383299	0		41.7796	0	M	1	1	0	0	0	0	0	0	1	0	http://www.jsc.nasa.gov/Bios/PS/trinh.html	https://en.wikipedia.org/wiki/STS-50	http://www.spacefacts.de/bios/astronauts/english/trinh_eugene.htm
366	Van Den Berg, Lodewijk	Not Announced	1932-03-24	Current NASA	Alive (1/31/17)	1985-04-29	1985-04-29				53.0979					0		53.0979	0	M	1	1	0	0	0	0	0	0	1	0	http://www.jsc.nasa.gov/Bios/htmlbios/vandenberg-l.html
367	Walker, Charles D.	Not Announced	1948-08-29	1985-12-03	Alive (1/31/17)	1984-08-30	1985-11-27			37.2621	37.2457	0.0164271			1.25941	1.24298		36.0027	0	M	0	0	0	0	0	0	0	0	1	0	http://www.jsc.nasa.gov/Bios/PS/walker.html	https://en.wikipedia.org/wiki/Charles_D._Walker	http://www.spacefacts.de/bios/astronauts/english/walker_charles.htm
368	Wang, Taylor	Not Announced	1940-06-16	1985-05-06	Alive (1/31/17)	1985-04-29	1985-04-29			44.8871	44.8679	0.019165			0.019165	0		44.8679	0	M	1	1	0	0	0	0	0	0	1	0	http://www.jsc.nasa.gov/Bios/htmlbios/wang-t.html
